# Supplementary material for: Dominant gut Prevotella copri in gastrectomised non-obese diabetic Goto–Kakizaki rats improves glucose homeostasis through enhanced FXR signalling
Source: PubMed Central journal article supplement (PMC7228998; doi:10.1007/s00125-020-05122-7), 2020-03-16
Supplement: 125_2020_5122_MOESM1_ESM.pdf [file 125_2020_5122_MOESM1_ESM.pdf]

## **ESM Material and Methods**

### **Animals**

Goto-Kakizaki (GK/Ox) rats were maintained in individually ventilated cages in a controlled environment (12 h dark-light cycles 22–24°C; humidity 50–60%). They had ad libitum access to water and standard chow (SAFE, Augy, France). Animals from the experimental and control groups were housed in different cages to avoid unintentional microbiota transplants via coprophagy. Animals were randomly assigned to experimental and control groups and all glucose tolerance tests and analytical assays were blinded. Animal procedures were authorized by the University Ethics Committee in Animal Experiment (4231201602231507187).

### **VSG**

Vertical sleeve gastrectomy (VSG) was performed in 16-week-old male GK rats. Rats were anesthetized by isoflurane intoxication and the lateral 80% of the stomach was excised with a linear cutter (TLC55, Ethicon, Issy Les Moulineaux, France) to leave a tubular gastric remnant in continuity with the oesophagus, the pylorus and the duodenum. Post-surgical analgesia was applied over the following three days with enrofloxacin 2.5% (5mg/kg body weight) and buprenorphine (200µg/kg body weight). Some animals were excluded from the protocol following gastrectomy and were culled when excessive loss of body condition was observed. Control GK rats were sham operated using a procedure involving isolation of the stomach followed by application of pressure with blunt forceps along a vertical line between the oesophageal sphincter and the pylorus. Rats were killed by cervical dislocation 13 weeks after the surgical procedures and the content of caecum and colon were rapidly harvested, quick-frozen in liquid nitrogen and stored at -80°C.

### **Pair-feeding studies**

Thirty days after surgery, sham rats were pair-fed to match the food intake of free-fed VSG GK rats. The equivalent amount of food consumed by GK rats of the VSG group was given to sham operated GK rats in a single dose at 6 pm, which corresponds to the beginning of the activity phase of the animals. Blood glucose was determined using an Accu-Check® Performa (Roche Diagnostics, Meylan, France).

### **Gut microbiota transfer**

Five month old male GK rats were treated orally with Inexium (Omeprazole, Astrazeneca, Courbevoie, France) (2mL/rat) for three days followed by gavage with Moviprep (Norgine, Rueil-Malmaison, France) (2mL/rat) [1, 2]. Caecal microbiota (250mg) from VSG treated or sham operated GK rats were homogenised in 1mL of saline and centrifuged. The supernatant of each sample was collected (no pool) and individually used to inoculate both orally (300µL) and by rectal injection (300µL) GK rats under general anesthesia (ketamine/xylazine). Inoculations were carried out one week after the Moviprep treatment.

### **Enrichment of gut microbiota with *P. copri***

*P. copri* is tolerant to vancomycin and kanamycin antibiotics [3]. Randomly selected five month old male GK rats were given vancomycin (0.5g/L) and kanamycin (1g/L) [4] in the drinking water for ten days. GK controls remained on antibiotic-free maintenance conditions.

### ***P. copri* supplementation**

Commercially available *P. copri* (DSM 18205, DSMZ, Braunschweig, Germany) was cultivated under anaerobic conditions on BD Schaedler Kanamycin-Vancomycin Agar with 5% Sheep Blood (Biomerieux, Marcy l'Etoile, France). We adapted to the rat the procedure of *P. copri* supplementation optimized in mice by Kovatcheva-Datchary and colleagues [5]. Five month old male GK rats were given vancomycin (0.5g/l), neomycin (1g/l), metronidazole (1g/l) and ampicillin (1g/l) [6] in the drinking water during ten days. Then,

randomly selected rats were inoculated with a single gavage of  $5.10^8$  CFU *P. copri*. The control group received an equivalent dosage of heat-killed *P. copri*.

### **Glucose tolerance tests and sample collection and analysis**

Oral and intraperitoneal glucose tolerance tests (OGTT, IPGTT) were performed in conscious rats after an overnight fast. Due to changes in intra-abdominal organs secondary to gastrectomy, including extensive connective tissue, OGTT were preferred to IPGTT to assess glucose tolerance and glucose-induced insulin secretion in VSG treated rats (Experiment 1, Fig. 1). OGTT was also used to assess glucose tolerance in sham operated controls. For OGTT, a bolus of glucose (1g/kg body weight) was given by gavage in conscious rats. Blood samples were collected from the tail vein before glucose administration and 15, 30, 60, 90 and 120 min afterwards. For IPGTT carried out in GK rats inoculated with the caecal content of VSG or sham operated GK (Experiment 2, Fig. 1), treated with *P. copri* permissive antibiotics or no antibiotics (Experiment 3, Fig. 1) and inoculated with *P. copri* or heat inactivated *P. copri* (Experiment 4, Fig. 1), conscious rats were injected intraperitoneally with a solution of glucose (1g/kg body weight) after an overnight fast. Blood samples were collected from the tail vein before glucose injection and 5, 15, 30, 60, 90, 120, 180 and 240 minutes afterwards. Glycemia was determined using an Accu-Check® Performa (Roche Diagnostics, Meylan, France) and insulinemia was assayed by ELISA (Mercodia, Uppsala, Sweden). Glucose tolerance was assessed with the cumulative glycemia (increment of glucose values during the test) and the  $\Delta G$  (cumulative glycemia above baseline).

Three days after the glucose tolerance tests, rats were fasted overnight and killed by lethal injection of sodium pentobarbital. Plasma samples, adipose tissue, liver and caecal content were quick-frozen in liquid nitrogen and stored at  $-80^{\circ}\text{C}$ . Colorimetric assays were used to determine plasma and liver triglycerides (ab65336; Abcam, Paris, France) and liver glycogen (Sigma-Aldrich).

## **Metagenome sequencing**

Bacterial DNA was independently prepared from caecal (10 from VSG-treated GK rats and 8 from sham operated GK controls) and colon (6 from VSG-treated GK rats and 3 from sham operated GK controls) samples (DNAStool mini kit, QIAGEN, Courtaboeuf, France). Whole-genome shotgun sequencing was performed on Illumina HiSeq 2000 instruments (Illumina, San Diego, CA) to generate 150nt sequence reads. For each sample, a single sequencing library was produced and bar-coded. Pools of four samples were run per lane. Every sample was sequenced on multiple instruments to minimize potential technical flow cell or instrument biases. Data was de-duplicated using standard in-house protocols. There were four separate sets of cluster building per sample in order to reduce errors of duplication and de-duplication. To estimate the biodiversity of the samples, the WGS data was mined for sequence motifs corresponding to a 55nt segment of the bacterial 16S rRNA variable 1-3 region. A total of 8,767 unique rDNA motifs were found (517,697 occurrences), the vast majority of which were rare, both in terms of number of samples detected and prevalence in individual samples. To reduce data sparsity, we analyzed motifs that accounted for a minimum prevalence of 0.5% or better in any individual sample. For preliminary indications of species identifications, motifs were aligned to publicly available microbial databases to retrieve perfect and highly similar matches.

## **Quantitative PCR**

Bacterial DNA from fresh caecum samples were extracted using DNA Stool mini kit (QIAGEN, Courtaboeuf, France). DNA yield and integrity were determined using a Nanodrop 2000c (Thermo Fisher Scientific, Illkirch, France) and agarose gel electrophoresis. *P. copri* enrichment was assessed by quantitative PCR using SYBR green assays (Life technologies, Saint Aubin, France) and comparison to universal 16S rRNA. Preparation of liver and adipose tissue RNA and quantitative RT-PCR analyses were performed as described

[7] using the housekeeping gene HPRT. Relative quantification of mRNA levels of candidate genes were carried out using the Livak and Schmittgen method [8]. Reactions were run on taqman 7900 HT system for *P. copri* analysis and on a CFX96 Real-Time system (Bio-Rad) for gene expression. Oligonucleotide sequences are given in **Supplementary Table 1**.

### **Quantitative analysis of plasma bile acids**

Plasma bile acids were quantified on 100µL plasma aliquots as described [9]. Plasma were spiked with isotopically labelled bile acid standards and treated with ice cold methanol in order to remove proteins. Bile acids were separated in an ACQUITY BEH C8 column and detected by a Xevo TQ-S mass spectrometer (Waters, Manchester, UK) operating in negative ionization mode and multiple reaction monitoring. The method allowed us to quantify up to 35 distinct bile acids.

### **Statistical analyses**

R packages were used to assess differences in the frequency of 16SrDNA motifs between gastrectomised and sham operated control rats and to compute a p-value for each motif with a threshold of significance set to 0.05. P-values were corrected for multiple testing using the Benjamini-Hochberg method [10]. Blood glucose and insulin secretion data during the glucose tolerance tests were analysed with the Kruskal-Wallis test in order to account for conserved intra-individual distribution of blood glucose and plasma insulin. Non-parametric Mann-Whitney U tests were used to assess differences in physiological phenotypes, bile acid data and gene expression between experimental and control groups.

### **References**

- [1] Manichanh C, Reeder J, Gibert P, et al. (2010) Reshaping the gut microbiome with bacterial transplantation and antibiotic intake. *Genome Res* 20(10): 1411-1419. 10.1101/gr.107987.110
- [2] Bartolí R, Boix J, Odena G, de Vega Moreno V, Lorenzo-Zúñiga V (2012) Determination of the ideal preparation for colonoscopy in a rat model. *Surg Laparosc Endosc Percutan Tech* 22(6): 542-545. 10.1097/SLE.0b013e318264c4f9

- [3] Tan H, Zhao J, Zhang H, Zhai Q, Chen W (2018) Isolation of Low-Abundant Bacteroidales in the Human Intestine and the Analysis of Their Differential Utilization Based on Plant-Derived Polysaccharides. *Front Microbiol* 9: 1319. [10.3389/fmicb.2018.01319](https://doi.org/10.3389/fmicb.2018.01319)
- [4] Rautio M, Lönnroth M, Saxén H, et al. (1997) Characteristics of an unusual anaerobic pigmented gram-negative rod isolated from normal and inflamed appendices. *Clin Infect Dis* 25 Suppl 2: S107-110
- [5] Kovatcheva-Datchary P, Nilsson A, Akrami R, et al. (2015) Dietary Fiber-Induced Improvement in Glucose Metabolism Is Associated with Increased Abundance of *Prevotella*. *Cell Metab* 22(6): 971-982. [10.1016/j.cmet.2015.10.001](https://doi.org/10.1016/j.cmet.2015.10.001)
- [6] Rakoff-Nahoum S, Paglino J, Eslami-Varzaneh F, Edberg S, Medzhitov R (2004) Recognition of commensal microflora by toll-like receptors is required for intestinal homeostasis. *Cell* 118(2): 229-241. [10.1016/j.cell.2004.07.002](https://doi.org/10.1016/j.cell.2004.07.002)
- [7] Brial F, Le Lay A, Hedjazi L, et al. (2019) Systems Genetics of Hepatic Metabolome Reveals Octopamine as a Target for Non-Alcoholic Fatty Liver Disease Treatment. *Sci Rep* 9(1): 3656. [10.1038/s41598-019-40153-0](https://doi.org/10.1038/s41598-019-40153-0)
- [8] Livak KJ, Schmittgen TD (2001) Analysis of relative gene expression data using real-time quantitative PCR and the 2<sup>-</sup>(Delta Delta C(T)) Method. *Methods* 25(4): 402-408. [10.1006/meth.2001.1262](https://doi.org/10.1006/meth.2001.1262)
- [9] Sarafian MH, Lewis MR, Pechlivanis A, et al. (2015) Bile acid profiling and quantification in biofluids using ultra-performance liquid chromatography tandem mass spectrometry. *Anal Chem* 87(19): 9662-9670. [10.1021/acs.analchem.5b01556](https://doi.org/10.1021/acs.analchem.5b01556)
- [10] Benjamini Y, Hochberg Y (1995) Controlling the false discovery rate: a practical and powerful approach to multiple testing. *J R Stat Soc* 57(1): 289-300

ESM Table 1. Oligonucleotides used for quantitative RT PCR.

|                | <b>Forward</b>            | <b>Reverse</b>          |
|----------------|---------------------------|-------------------------|
| <i>Fxr</i>     | TACCATTACAACGGCTCAC       | GCCCCGTTCTTACTTG        |
| <i>Shp</i>     | GCAGCACTGCCTGGAGTC        | GTGTGCAATGTGGCAGGA      |
| <i>Pepck</i>   | GAAGGAGTGCCCATCGAA        | TCCTACAAACACCCCATGCT    |
| <i>G6pc</i>    | TCAAGAGACTGTGGGCATCA      | GGCGCTGTCCAAAAGAAT      |
| <i>Srebf1</i>  | CCGTTTCTTCGTGGATGG        | CACAGAATAGTCGGGTCACCT   |
| <i>chrebp</i>  | ACTGTTCCCTGCCTGCTCT       | CCTTGTGGCTTGCTCAGG      |
| <i>Sorbs1</i>  | CTTGCAAGCACAACCGAGAT      | GATGGGCGAGGTGAGTTCT     |
| <i>Pygl</i>    | GAGTGCTGTACCCCAACGAT      | CCTTGAAACGTCGGATGAC     |
| <i>Hprt</i>    | GGTCCATTCTATGACTGTAGATTTT | AACAATCAAGACGTTCTTTCCAG |
| 16S            | ACTCCTACGGGAGGCAGCAGT     | ATTACCGCGGCTGCTGGC      |
| <i>P.Copri</i> | CCGGACTCCTGCCCTGCAA       | GTTGCGCCAGGCACTGCGAT    |

**ESM Table 2.** Frequency of rDNA motifs in gut microbiota from gastrectomised (Vertical sleeve gastrectomy, VSG) and sham operated rats of the Goto-Kakizaki strain. The rDNA motifs shown are present at a frequency >0.005% in at least 50% of individual rats. Frequencies of rDNA motifs from caecum samples were used to calculate means and SEM.

| rDNA Motif | rDNA motif Sequence                                       | SHAM      |           | VSG        |           |
|------------|-----------------------------------------------------------|-----------|-----------|------------|-----------|
|            |                                                           | Mean      | SEM       | Mean       | SEM       |
| V13A7759   | ATTACCGCGGCTGCTGGCACGGAATTAGCCGGTCCTTATTCATAAGGTACATGCA   | 9.073960% | 3.113758% | 22.705789% | 5.538537% |
| V13A2810   | ATTACCGCGGCTGCTGGCACGTAGTTAGCCGGGGCTTCTTACTCAGGTACCGTCA   | 7.492013% | 1.036242% | 6.994838%  | 1.253067% |
| V13A5897   | ATTACCGCGGCTGCTGGCACGTAGTTAGCCGGGGCTTCTTGGTCAGGTACCGTCA   | 7.062306% | 1.079612% | 5.177857%  | 1.333343% |
| V13A12285  | ATTACCGCGGCTGCTGGCACGTAGTTAGCCGGGGCTTCTTAGTCAGGTACCGTCA   | 5.790701% | 0.854445% | 5.759024%  | 1.063598% |
| V13A395    | ATTACCGCGGCTGCTGGCACGGAGTTAGCCGATGCTTTTTCTCCGGGTACTCTCC   | 3.075614% | 1.097742% | 3.565136%  | 0.726443% |
| V13A6709   | ATTACCGCGGCTGCTGGCACGGAATTAGCCGGTCCTTATTCATACGGTACCTGCA   | 3.042629% | 0.537824% | 1.493961%  | 0.236652% |
| V13A14448  | ATTACCGCGGCTGCTGGCACGGAATTAGCCGGTCCTTATTCATGCGGTACCTGCA   | 2.135061% | 0.558220% | 2.724241%  | 0.436746% |
| V13A2287   | ATTACCGCGGCTGCTGGCACGGAGTTAGCCGATGCTTATTCATACGGTACATACA   | 2.858376% | 0.571613% | 2.147298%  | 0.404692% |
| V13A14726  | ATTACCGCGGCTGCTGGCACGGAGTTAGCCGATGCTTTTTCTCAGGGTACTCTCC   | 3.007887% | 0.701885% | 2.377838%  | 0.588273% |
| V13A7919   | ATTACCGCGGCTGCTGGCACGGAGTTAGCCGATGCTTTTTCTCAGGTACTCTCA    | 2.128682% | 0.688518% | 4.629847%  | 1.245758% |
| V13A5402   | ATTACCGCGGCTGCTGGCACGGAGTTAGCCGATGCTTTTTCTCAGGGTACTCTCG   | 1.868137% | 0.344738% | 1.920562%  | 0.280246% |
| V13A1689   | ATTACCGCGGCTGCTGGCACGGAGTTAGCCGATGCTTTTTCTCAGGTACTCTCG    | 1.161420% | 0.751805% | 1.255658%  | 0.345201% |
| V13A7641   | ATTACCGCGGCTGCTGGCACGTAGTTAGCCGTGACTTTCTGGTTGATTACCGTCA   | 0.797960% | 0.074973% | 1.448365%  | 0.803381% |
| V13A4836   | ATTACCGCGGCTGCTGGCACGGAGTTAGCCGATCCTTATTCGATGGTACATACA    | 0.520971% | 0.514560% | 1.641454%  | 0.550971% |
| V13A4809   | ATTACCGCGGCTGCTGGCACGTAGTTAGCCGGGGCTTCTTAATCAGGTACCGTCT   | 1.771341% | 0.940886% | 1.165276%  | 0.448003% |
| V13A7817   | ATTACCGCGGCTGCTGGCACGGAGTTAGCCGATGCTTTTTCTCCGGGTACTCTCA   | 0.598281% | 0.091503% | 0.557536%  | 0.240674% |
| V13A8451   | ATTACCGCGGCTGCTGGCACGTAGTTAGCCGTGGCTTAACCTCAGGTACCGTCAT   | 1.814001% | 0.614578% | 0.096369%  | 0.039797% |
| V13A9035   | ATTACCGCGGCTGCTGGCACGTAGTTAGCCGTTGCTTTTTCTCCAGGTACCGTCA   | 0.757123% | 0.343471% | 0.396081%  | 0.100330% |
| V13A9309   | ATTACCGCGGCTGCTGGCACGGAGTTAGCCGATGCTTTTTCTCAGGGTACACGCA   | 0.349578% | 0.243147% | 1.017451%  | 0.228088% |
| V13A3764   | ATTACCGCGGCTGCTGGCACGGAGTTAGCCGATGCTTTTTCTCCGGGTACCCTCA   | 0.844584% | 0.298465% | 0.485913%  | 0.133419% |
| V13A2469   | ATTACCGCGGCTGCTGGCACGGAATTAGCCGATGCTTATTCATAAGGTACATACA   | 1.514555% | 0.612323% | 0.460579%  | 0.247414% |
| V13A8741   | ATTACCGCGGCTGCTGGCACGGAGTTAGCCGATGCTTTTTCTCAGGGTACTCTCA   | 0.652240% | 0.252331% | 0.402395%  | 0.257189% |
| V13A15371  | ATTACCGCGGCTGCTGGCACGTAGTTAGCCGTGGCTTATTCATAAGAGGTACCGTCT | 0.962511% | 0.167741% | 0.681418%  | 0.132381% |
| V13A3935   | ATTACCGCGGCTGCTGGCACGGAGTTAGCCGATCCTTATTCATACGGTACATACA   | 0.888069% | 0.212414% | 0.406619%  | 0.120174% |



|           |                                                          |           |           |           |           |
|-----------|----------------------------------------------------------|-----------|-----------|-----------|-----------|
| V13A5381  | ATTACCGCGGCTGCTGGCACGGAGTTAGCCGATGCTTTTTCTTCGGGTACTCTCA  | 1.277505% | 0.323793% | 0.589433% | 0.165869% |
| V13A399   | ATTACCGCGGCTGCTGGCACGGAGTTAGCCGATGCTTTTTCTCCGGGTACTCTCG  | 0.901794% | 0.117232% | 0.483733% | 0.167078% |
| V13A10361 | ATTACCGCGGCTGCTGGCACGAAGTTAGCCGGTGCTTTTTCTGTCGCTACTGTCA  | 0.658245% | 0.137179% | 0.326717% | 0.120989% |
| V13A1694  | ATTACCGCGGCTGCTGGCACGGAGTTAGCCGATGCTTTTTCTCAGGTACTCTCA   | 0.726491% | 0.378283% | 0.159166% | 0.094443% |
| V13A296   | ATTACCGCGGCTGCTGGCACGTAGTTAGCCGGTGCTTATTCTTAGAGTACCGTCA  | 0.471294% | 0.034958% | 0.613924% | 0.158336% |
| V13A13773 | ATTACCGCGGCTGCTGGCACGTAGTTAGCCGTGGCTTCTGGTTAGATACCGTCCG  | 0.537240% | 0.180613% | 0.480570% | 0.142488% |
| V13A12346 | ATTACCGCGGCTGCTGGCACGTAGTTAGCCGTGGCTTATTCAAGGGTACCGTCT   | 0.612998% | 0.079235% | 0.868195% | 0.199052% |
| V13A13515 | ATTACCGCGGCTGCTGGCACGTAGTTAGCCGTGGCTTATTCTCAGGTACCGTCA   | 0.662303% | 0.122855% | 0.769364% | 0.127965% |
| V13A2602  | ATTACCGCGGCTGCTGGCACGTAGTTAGCCGGAGCTTCTTGAAGGTACCGTCA    | 0.580478% | 0.184266% | 0.459190% | 0.127540% |
| V13A7275  | ATTACCGCGGCTGCTGGCACGGAGTTAGCCGATCCTTATTCATAAAGTACATGCA  | 0.685053% | 0.126167% | 0.328284% | 0.093346% |
| V13A3762  | ATTACCGCGGCTGCTGGCACGGAGTTAGCCGATGCTTTTTCTCCGGGTACCCTCG  | 0.641765% | 0.260571% | 0.299114% | 0.120361% |
| V13A15465 | ATTACCGCGGCTGCTGGCACGGAGTTAGCCGGTGCTTCTCTGTGGGTACCGTCA   | 0.467655% | 0.098343% | 0.422795% | 0.113124% |
| V13A13991 | ATTACCGCGGCTGCTGGCACGTAGTTAGCCGGGGCTTCTTGGTCAGGTACCGTCC  | 1.122187% | 1.044288% | 0.091681% | 0.034861% |
| V13A14005 | ATTACCGCGGCTGCTGGCACGTAGTTAGCCGGGGCTTCTTGGTCAGGTACCGTCT  | 0.921962% | 0.489481% | 0.417073% | 0.253385% |
| V13A6464  | ATTACCGCGGCTGCTGGCACAGACTTGCCCTCAATGGATCCTCGTAAAGGAT     | 0.363374% | 0.222759% | 0.368286% | 0.136257% |
| V13A8908  | ATTACCGCGGCTGCTGGCACGTAGTTAGCCGTGACTTTCTGGTTGGATAACCGTCA | 0.423517% | 0.132131% | 0.373155% | 0.074619% |
| V13A3428  | ATTACCGCGGCTGCTGGCACGGAGTTAGCCGATGCTTTTTCTTCGGGTACTCTCC  | 0.427074% | 0.125405% | 0.659545% | 0.255987% |
| V13A9942  | ATTACCGCGGCTGCTGGCACGGAGTTAGCCGATGCTTTTTCTCAGGTACCCTCA   | 0.322128% | 0.207905% | 0.232828% | 0.118087% |
| V13A2378  | ATTACCGCGGCTGCTGGCACGTATTTAGCCGGTGCTTCTTAGTCAGGTACCGTCA  | 0.319487% | 0.118423% | 0.433062% | 0.148852% |
| V13A12274 | ATTACCGCGGCTGCTGGCACGTAGTTAGCCGGGGCTTCTTAGTCAGGTACCGTCT  | 0.398442% | 0.070005% | 0.571416% | 0.135201% |
| V13A4785  | ATTACCGCGGCTGCTGGCACGTAGTTAGCCGTGGCTTATTCGTCAGGTACCGTCA  | 0.499526% | 0.067431% | 0.374966% | 0.050785% |
| V13A12862 | ATTACCGCGGCTGCTGGCACGTATTTAGCCGGAGCTTCTTAGTCAGGTACCGTCA  | 0.492408% | 0.151763% | 0.232185% | 0.070782% |
| V13A13172 | ATTACCGCGGCTGCTGGCACGTAGTTAGCCGGGGCTGCTTACTCAGGTACCGTCA  | 0.705369% | 0.288026% | 0.370483% | 0.190582% |
| V13A13919 | ATTACCGCGGCTGCTGGCACGGAGTTAGCCGATCCTTATTCGTACGATACTTTCA  | 0.431286% | 0.146402% | 0.207771% | 0.037019% |
| V13A14410 | ATTACCGCGGCTGCTGGCACGGAGTTAGCCGATGCTTATTCTCCGGGTACTCTCA  | 0.003467% | 0.001814% | 0.636456% | 0.547968% |
| V13A4765  | ATTACCGCGGCTGCTGGCACGTAGTTAGCCGTGGCTTCTCCGCGGGTACCGTCA   | 0.258695% | 0.107711% | 0.355995% | 0.115338% |
| V13A4931  | ATTACCGCGGCTGCTGGCACGGAGTTAGCCGGTGCTTCTTCTGCGGGTAACGTCA  | 0.162788% | 0.125621% | 0.532038% | 0.453717% |
| V13A9079  | ATTACCGCGGCTGCTGGCACGTAGTTAGCCGTGGCTTCTTAAAGGGTACCGTCA   | 0.447368% | 0.199142% | 0.284447% | 0.059115% |
| V13A4794  | ATTACCGCGGCTGCTGGCACGTAGTTAGCCGTGGCTTATTCGTCAGGTACCGTCT  | 0.318805% | 0.058714% | 0.477093% | 0.114728% |
| V13A7810  | ATTACCGCGGCTGCTGGCACGTAGTTAGCCGTGGCTTATTCAACAGGTACCGTCA  | 0.389182% | 0.097889% | 0.292454% | 0.033631% |

|           |                                                      |           |           |           |           |
|-----------|------------------------------------------------------|-----------|-----------|-----------|-----------|
| V13A397   | ATTACCGCGGCTGCTGGCACGGAGTTAGCCGATGCTTTTTCTCCGGGTA    | 0.231137% | 0.047982% | 0.353059% | 0.193770% |
| V13A5701  | ATTACCGCGGCTGCTGGCACGTAGTTAGCCGGGCTTCTTAGTCAGGTA     | 0.436434% | 0.224545% | 0.388864% | 0.244682% |
| V13A8825  | ATTACCGCGGCTGCTGGCACGTAGTTAGCCGTGGCTTATTCATCAGGTA    | 0.365925% | 0.045631% | 0.278714% | 0.051819% |
| V13A3265  | ATTACCGCGGCTGCTGGCACGTAGTTAGCCGAGGCTTATTCCTAAGGTA    | 0.372160% | 0.099899% | 0.352172% | 0.111873% |
| V13A7921  | ATTACCGCGGCTGCTGGCACGGAGTTAGCCGATGCTTTTTCTCAGGTA     | 0.522578% | 0.215917% | 0.152104% | 0.060037% |
| V13A14225 | ATTACCGCGGCTGCTGGCACGGAGTTAGCCGATGCTTTTTCTCCGGTA     | 0.064088% | 0.046996% | 0.310420% | 0.096528% |
| V13A3045  | ATTACCGCGGCTGCTGGCACGTAGTTAGCCGTGGCTTATTCATTCGGTA    | 0.375331% | 0.049509% | 0.239554% | 0.053794% |
| V13A9455  | ATTACCGCGGCTGCTGGCACGTAGTTAGCCGTGGCTTATTCCTAAGGTA    | 0.461836% | 0.183591% | 0.313700% | 0.135863% |
| V13A9476  | ATTACCGCGGCTGCTGGCACGTAGTTAGCCGTGGCTTCTGAATAGTACA    | 0.274998% | 0.097695% | 0.183092% | 0.117623% |
| V13A4570  | ATTACCGCGGCTGCTGGCACGTATTAGCCGGGCTTCTTAGTCAAGTACA    | 0.370027% | 0.304566% | 0.045416% | 0.028404% |
| V13A10016 | ATTACCGCGGCTGCTGGCACGGAGTTAGCCGATCCTTATTCATATGGTACA  | 0.251930% | 0.065103% | 0.122937% | 0.020297% |
| V13A9779  | ATTACCGCGGCTGCTGGCACGTAGTTAGCCGTGGCTTCTGAATGGTACA    | 0.238195% | 0.088096% | 0.159937% | 0.077970% |
| V13A15364 | ATTACCGCGGCTGCTGGCACGTAGTTAGCCGTGGCTTATTCAAGAGTACA   | 0.326098% | 0.100808% | 0.198171% | 0.041510% |
| V13A5861  | ATTACCGCGGCTGCTGGCACGTAGTTAGCCGAGCTTCTCTCTGCTACA     | 0.240907% | 0.090468% | 0.222516% | 0.049927% |
| V13A2959  | ATTACCGCGGCTGCTGGCACGTAGTTAGCCGTGGCTTCTTAAGGGTACA    | 0.368274% | 0.119296% | 0.161128% | 0.089590% |
| V13A4574  | ATTACCGCGGCTGCTGGCACGTAGTTAGCCGAGCTTCTCTCTGGTACA     | 0.140794% | 0.088784% | 0.418000% | 0.256027% |
| V13A890   | ATTACCGCGGCTGCTGGCACGTAGTTAGCCGAGCTTATTCTACAGTACTGCT | 0.186033% | 0.046808% | 0.161842% | 0.033215% |
| V13A1692  | ATTACCGCGGCTGCTGGCACGGAGTTAGCCGATGCTTTTTCTCAGTACTCC  | 0.318164% | 0.102340% | 0.122003% | 0.035755% |
| V13A11018 | ATTACCGCGGCTGCTGGCACGTAGTTAGCCGTGACTTTCTAAGTAATTACA  | 0.054835% | 0.021761% | 0.020063% | 0.005370% |
| V13A6953  | ATTACCGCGGCTGCTGGCACGTAGTTAGCCGTGGCTTATTCCTGAGTACA   | 0.287954% | 0.087473% | 0.167002% | 0.028440% |
| V13A12840 | ATTACCGCGGCTGCTGGCACGGAGTTAGCCGATGCTTTTTCTCAGTACTCG  | 0.363406% | 0.186690% | 0.078483% | 0.040605% |
| V13A12857 | ATTACCGCGGCTGCTGGCACGTATTAGCCGAGCTTCTTAGTCAGGTA      | 0.285795% | 0.140626% | 0.022901% | 0.006473% |
| V13A10048 | ATTACCGCGGCTGCTGGCACGTAGTTAGCCGAGCTTATTCATTGGTACA    | 0.664762% | 0.265586% | 0.004005% | 0.003247% |
| V13A12206 | ATTACCGCGGCTGCTGGCACGTAGTTAGCCGATGCTTATTCCTTAGTACA   | 0.141923% | 0.116299% | 0.205885% | 0.052833% |
| V13A7023  | ATTACCGCGGCTGCTGGCACGTAGTTAGCCGAGCTTCTCTTAGTACTGCT   | 0.211395% | 0.176694% | 0.036946% | 0.010320% |
| V13A4817  | ATTACCGCGGCTGCTGGCACGTAGTTAGCCGGGCTTCTTAATCAGGTA     | 0.327726% | 0.114804% | 0.180825% | 0.093872% |
| V13A2090  | ATTACCGCGGCTGCTGGCACGTAGTTAGCCGTGGCTTTTTCTCAGTACA    | 0.156921% | 0.058349% | 0.153020% | 0.023402% |
| V13A9744  | ATTACCGCGGCTGCTGGCACGTAGTTAGCCGAGCTTCTCCCAGTACA      | 0.204856% | 0.043307% | 0.188786% | 0.037579% |
| V13A6778  | ATTACCGCGGCTGCTGGCACGTAGTTAGCCGTGGCTTATTCATGAGTACA   | 0.158744% | 0.029032% | 0.110196% | 0.016649% |
| V13A3763  | ATTACCGCGGCTGCTGGCACGGAGTTAGCCGATCCTTATTCATAAGTACA   | 0.152878% | 0.051287% | 0.116417% | 0.022258% |

|           |                                                         |           |           |           |           |
|-----------|---------------------------------------------------------|-----------|-----------|-----------|-----------|
| V13A11183 | ATTACCGCGGCTGCTGGCACGTAGTTAGCCGGGGCTTCCTCTCAAGTACCGTCA  | 0.362917% | 0.288898% | 0.041124% | 0.015397% |
| V13A2248  | ATTACCGCGGCTGCTGGCACGTAGTTAGCCGTGGCTTATTCCTGGGTACCGTCA  | 0.178280% | 0.060737% | 0.127916% | 0.062748% |
| V13A2804  | ATTACCGCGGCTGCTGGCACGTAGTTAGCCGGGGCTTCTACTCAGGTACCGTCT  | 0.191374% | 0.150683% | 0.247214% | 0.143975% |
| V13A2715  | ATTACCGCGGCTGCTGGCACGGAGTTAGCCGATGCTTTTTCTCCGGGTACGCTCC | 0.192335% | 0.086924% | 0.040751% | 0.006881% |
| V13A9336  | ATTACCGCGGCTGCTGGCACGGAGTTAGCCGGTGCTTCCTCTGCAGGTACAGTCA | 0.122746% | 0.044292% | 0.121646% | 0.049237% |
| V13A12283 | ATTACCGCGGCTGCTGGCACGTAGTTAGCCGGGGCTTCTTAGTCAGGTACCGTCC | 0.149669% | 0.058312% | 0.135433% | 0.039204% |
| V13A10886 | ATTACCGCGGCTGCTGGCACGGAGTTAGCCGATGCTTCCTCTGTGGGTACCGTCA | 0.204921% | 0.126672% | 0.085847% | 0.044966% |
| V13A3640  | ATTACCGCGGCTGCTGGCACGTAGTTAGCCGTGGCTTATTCCTGGGGTACCGTCA | 0.254593% | 0.157222% | 0.147631% | 0.093794% |
| V13A13697 | ATTACCGCGGCTGCTGGCACGTAGTTAGCCGGGGCTTCTACTCAGGTACTGTCA  | 0.144281% | 0.059503% | 0.133587% | 0.062692% |
| V13A9310  | ATTACCGCGGCTGCTGGCACGGAGTTAGCCGATGCTTTTTCTCGGGTACGCTCG  | 0.087376% | 0.025648% | 0.119551% | 0.031588% |
| V13A234   | ATTACCGCGGCTGCTGGCACGGAGTTAGCCGATCCTTATTCATAAAGTACATACA | 0.148108% | 0.031337% | 0.071154% | 0.057642% |
| V13A6810  | ATTACCGCGGCTGCTGGCACGTAGTTAGCCGAGGCTTATTCTGCGGGTACAGTCA | 0.089681% | 0.027008% | 0.155656% | 0.032834% |
| V13A9699  | ATTACCGCGGCTGCTGGCACGTAGTTAGCCGTGGCTTATTCTTGGGGTACCGTCA | 0.151717% | 0.065056% | 0.106825% | 0.036717% |
| V13A7528  | ATTACCGCGGCTGCTGGCACGTAGTTAGCCGGAGCTTATTCTATAGGTACTGTCT | 0.063967% | 0.024797% | 0.025375% | 0.014026% |
| V13A762   | ATTACCGCGGCTGCTGGCACGTAGTTAGCCGGAGCTTATTATTGGGTACCGTCA  | 0.298162% | 0.238334% | 0.070131% | 0.045810% |
| V13A9832  | ATTACCGCGGCTGCTGGCACGTAGTTAGCCGTGGCTTCCTCTTGGTTACCGTCA  | 0.273462% | 0.097341% | 0.000000% | 0.000000% |
| V13A12281 | ATTACCGCGGCTGCTGGCACGTAGTTAGCCGGGGCTTCTTAGTCAGGTACCGTCC | 0.120772% | 0.061095% | 0.210869% | 0.134322% |
| V13A5211  | ATTACCGCGGCTGCTGGCACGTAGTTAGCCGTGGCTTATTCCTCGGGTACCGTCA | 0.051343% | 0.024606% | 0.258342% | 0.142205% |
| V13A14912 | ATTACCGCGGCTGCTGGCACGTATTTAGCCGGTGCTTCTTCTCAGGTACCGTCA  | 0.153996% | 0.118104% | 0.067371% | 0.049555% |
| V13A8693  | ATTACCGCGGCTGCTGGCACGGAGTTAGCCGGTGCTTCCTTTGAAGGTACCGTCA | 0.087164% | 0.018621% | 0.108535% | 0.027285% |
| V13A9224  | ATTACCGCGGCTGCTGGCACGTAGTTAGCCGTGGCTTCTCATTGGGTACAGTCA  | 0.143025% | 0.050414% | 0.053836% | 0.022704% |
| V13A7033  | ATTACCGCGGCTGCTGGCACGTAGTTAGCCGGAGCTTCCTCTTAGGTACTGTCC  | 0.130017% | 0.019237% | 0.064986% | 0.008975% |
| V13A6692  | ATTACCGCGGCTGCTGGCACGTAGTTAGCCGGAGCTTCTAAATAGGTACCGTCA  | 0.099832% | 0.029342% | 0.168992% | 0.031914% |
| V13A2034  | ATTACCGCGGCTGCTGGCACGTAGTTAGCCGGAGCTTATTATTAAGTACCGTCA  | 0.118148% | 0.060067% | 0.026863% | 0.015383% |
| V13A3780  | ATTACCGCGGCTGCTGGCACGTAGTTAGCCGGGGCTTCTTATTAGGTACCGTCA  | 0.331581% | 0.302038% | 0.020284% | 0.004292% |
| V13A795   | ATTACCGCGGCTGCTGGCACGTAGTTAGCCGGGGCTTCTTATTAGGTACTGTCA  | 0.119465% | 0.070474% | 0.161858% | 0.075060% |
| V13A12353 | ATTACCGCGGCTGCTGGCACGTAGTTAGCCGTGGCTTATTCTGGAGTACCGTCA  | 0.150392% | 0.067379% | 0.060485% | 0.024290% |
| V13A6268  | ATTACCGCGGCTGCTGGCACGGAATTAGCCGGCCCTTATTGACAGGTACCTGCA  | 0.230506% | 0.105329% | 0.077303% | 0.041677% |
| V13A1861  | ATTACCGCGGCTGCTGGCACGGAGTTAGCCGGTGCTTCTCTGTGATTAACGTCA  | 0.030512% | 0.007869% | 0.124497% | 0.024124% |
| V13A12247 | ATTACCGCGGCTGCTGGCACGTAGTTAGCCGAGGCTTATTCTGTGGGTACCGTCA | 0.085460% | 0.049299% | 0.046031% | 0.030991% |

|           |                                                          |           |           |           |           |
|-----------|----------------------------------------------------------|-----------|-----------|-----------|-----------|
| V13A686   | ATTACCGCGGCTGCTGGCACGTAGTTAGCCGTTGCTTTTTCTGCAGGTACCGTCA  | 0.136968% | 0.052156% | 0.021882% | 0.010981% |
| V13A13238 | ATTACCGCGGCTGCTGGCACATAGTTAGCCGGGGCTTCCTCCTTAGGTACAGTCT  | 0.076138% | 0.027324% | 0.061346% | 0.019143% |
| V13A9407  | ATTACCGCGGCTGCTGGCACGGAATTAGCCGATGCTTATTCTTCGGATACTTGCA  | 0.088140% | 0.042325% | 0.100783% | 0.031700% |
| V13A4788  | ATTACCGCGGCTGCTGGCACGTAGTTAGCCGTGGCTTGTTCAGGGTACCGTCT    | 0.118252% | 0.028708% | 0.074330% | 0.020813% |
| V13A12329 | ATTACCGCGGCTGCTGGCACGTAGTTAGCCGTGGCTTATTCAAGGGTACCGTCA   | 0.041330% | 0.024689% | 0.191548% | 0.152264% |
| V13A10205 | ATTACCGCGGCTGCTGGCACGTAGTTAGCCGGAGCTTATTCTTCGGGTACCGTCA  | 0.090057% | 0.028146% | 0.079705% | 0.029520% |
| V13A5823  | ATTACCGCGGCTGCTGGCACATAGTTAGCCGGAGCTTCCTCCTGAGGTACTGTCA  | 0.082170% | 0.034722% | 0.037340% | 0.013421% |
| V13A6595  | ATTACCGCGGCTGCTGGCACGTAGTTAGCCGGAGCTTTTTCTCCAGGTACCGTCA  | 0.105116% | 0.029292% | 0.051328% | 0.009318% |
| V13A9082  | ATTACCGCGGCTGCTGGCACGTAGTTAGCCGAGGCTTATTCTGTGGGTACAGTCA  | 0.112193% | 0.057894% | 0.031658% | 0.015528% |
| V13A7077  | ATTACCGCGGCTGCTGGCACGTAGTTAGCCGGGGCTTCTTGTTACAGGTACCGTCA | 0.004856% | 0.002685% | 0.149103% | 0.146447% |
| V13A13337 | ATTACCGCGGCTGCTGGCACGGAGTTAGCCGATGCTTATTCGTCAAGTACTGGCA  | 0.042316% | 0.010632% | 0.062282% | 0.012847% |
| V13A11382 | ATTACCGCGGCTGCTGGCACGTATTTAGCCGGAGCTTCTTATTACAGGTACTGTCA | 0.009740% | 0.009740% | 0.087731% | 0.038982% |
| V13A12760 | ATTACCGCGGCTGCTGGCACGTAGTTAGCCGGGGCTTTTTCTCAGGTACCTTCT   | 0.104498% | 0.043343% | 0.108764% | 0.048109% |
| V13A11188 | ATTACCGCGGCTGCTGGCACGTAGTTAGCCGTGGCTTCCTCCTGGGTACCGTCA   | 0.016272% | 0.005295% | 0.045527% | 0.026837% |
| V13A5050  | ATTACCGCGGCTGCTGGCACGGAGTTAGCCGATGCTTATTCGTGCGGTACTCTCA  | 0.086035% | 0.048021% | 0.059495% | 0.019942% |
| V13A258   | ATTACCGCGGCTGCTGGCACGTAGTTAGCCGGAGCTTCCTTCTCGGGTACCGTCA  | 0.068369% | 0.020358% | 0.055459% | 0.013430% |
| V13A8414  | ATTACCGCGGCTGCTGGCACGTAGTTAGCCGTGGCTTCCTTGACAGATACCGTCA  | 0.060047% | 0.026266% | 0.063741% | 0.042952% |
| V13A13323 | ATTACCGCGGCTGCTGGCACGAAGTTTGCCGGGGCTTTTAGATGTTACCGTCA    | 0.118083% | 0.070991% | 0.028087% | 0.011987% |
| V13A10709 | ATTACCGCGGCTGCTGGCACGTAGTTAGCCGGAGCTTCCTCCTCAGGTACCGTCA  | 0.030734% | 0.010855% | 0.036315% | 0.012108% |
| V13A1236  | ATTACCGCGGCTGCTGGCACGTAGTTAGCCGGAGCTTATTCAAGAGGTACCGTCT  | 0.089530% | 0.039263% | 0.060709% | 0.019819% |
| V13A8850  | ATTACCGCGGCTGCTGGCACGGAGTTAGCCGATGCTTTTTCTTCGGATACTTGCA  | 0.019434% | 0.008532% | 0.074119% | 0.049765% |
| V13A14699 | ATTACCGCGGCTGCTGGCACGTATTTAGCCGGTGCTTCTTACTCAGGTACCGTCA  | 0.067518% | 0.024450% | 0.030309% | 0.008587% |
| V13A6014  | ATTACCGCGGCTGCTGGCACGTAGTTAGCCGGGGCTTCTTAGCCAGGTACCGTCA  | 0.040351% | 0.026405% | 0.052468% | 0.039166% |
| V13A1661  | ATTACCGCGGCTGCTGGCACGGAGTTAGCCGATGCTTTTTCTCCGGGTACACGCA  | 0.062096% | 0.034851% | 0.081020% | 0.021781% |
| V13A9296  | ATTACCGCGGCTGCTGGCACGTAGTTAGCCGGAGCTTCCTCCTAAGGTACCGTCA  | 0.043959% | 0.021979% | 0.019808% | 0.012991% |
| V13A45    | ATTACCGCGGCTGCTGGCACGTAGTTAGCCGGAGCTTCCTCCTGGGTACCGTCA   | 0.074777% | 0.053482% | 0.017387% | 0.004133% |
| V13A603   | ATTACCGCGGCTGCTGGCACGTATTTAGCCGGAGCTTTTTCTCAGGTACCGTCA   | 0.135898% | 0.056931% | 0.017670% | 0.017670% |
| V13A1295  | ATTACCGCGGCTGCTGGCACGTAGTTAGCCGGGGCTTCTTACGAGGTACCGTCA   | 0.073239% | 0.015167% | 0.034518% | 0.011023% |
| V13A12979 | ATTACCGCGGCTGCTGGCACGTAGTTAGCCGTGGCTTACTTTACAGGTACCGTCA  | 0.045461% | 0.017193% | 0.030456% | 0.013540% |
| V13A5114  | ATTACCGCGGCTGCTGGCACGTAGTTAGCCGTGGCTTCCTGAACGGTACCGTCA   | 0.074931% | 0.015378% | 0.042323% | 0.015180% |

|           |                                                          |           |           |           |           |
|-----------|----------------------------------------------------------|-----------|-----------|-----------|-----------|
| V13A3848  | ATTACCGCGGCTGCTGGCACGTAGTTAGCCGTGGCTTATTCATACAGTACCGTCA  | 0.030343% | 0.006229% | 0.035692% | 0.008495% |
| V13A11648 | ATTACCGCGGCTGCTGGCACGTAGTTAGCCGTGGCTTCCTCCTCAGGTACCGTCA  | 0.028438% | 0.009794% | 0.024223% | 0.007373% |
| V13A12995 | ATTACCGCGGCTGCTGGCACAGACTTGCCCTCCAATGGATCCTCGTTAAGGGAT   | 0.023978% | 0.004845% | 0.012853% | 0.004422% |
| V13A819   | ATTACCGCGGCTGCTGGCACATAGTTAGCCGGGGCTTCCTCCTTAGGTACTGTCT  | 0.063650% | 0.048275% | 0.006537% | 0.004800% |
| V13A622   | ATTACCGCGGCTGCTGGCACGTAGTTAGCCGGAGCTTCCTCCTAAAGTACCGTCA  | 0.074626% | 0.035672% | 0.015386% | 0.004756% |
| V13A12536 | ATTACCGCGGCTGCTGGCACGTAGTTAGCCGTGGCTTTCTTGAATGGTACAGTCA  | 0.000504% | 0.000504% | 0.020131% | 0.007809% |
| V13A10103 | ATTACCGCGGCTGCTGGCACGTAGTTAGCCGTGGCTTATTCGACAGGTACCGTCT  | 0.031417% | 0.009301% | 0.076839% | 0.060777% |
| V13A6899  | ATTACCGCGGCTGCTGGCACGAAGTTAGCCGGGGCTTCCTTAGATGCTACCGTCA  | 0.041963% | 0.026224% | 0.015986% | 0.012218% |
| V13A6309  | ATTACCGCGGCTGCTGGCACGTAGTTAGCCGGAGCTTCCTCCCCGGGTACCGTCA  | 0.037062% | 0.018850% | 0.069357% | 0.035221% |
| V13A7383  | ATTACCGCGGCTGCTGGCACGTAGTTAGCCGATGCTTATTCTGTCCGGTACTGTCA | 0.053433% | 0.020862% | 0.019365% | 0.007335% |
| V13A2225  | ATTACCGCGGCTGCTGGCACGTAGTTAGCCGTGGCTTTCTCCTGAGGTACCATCA  | 0.052873% | 0.030087% | 0.034921% | 0.019502% |
| V13A1207  | ATTACCGCGGCTGCTGGCACGTAGTTAGCCGTGGCTTATTCCTTAGGTACCGTCA  | 0.028176% | 0.008400% | 0.052805% | 0.024462% |
| V13A1323  | ATTACCGCGGCTGCTGGCACAGACTTGCCCTCTCATAGATCCTCGTTAACGGTT   | 0.049526% | 0.033352% | 0.029041% | 0.016527% |
| V13A8742  | ATTACCGCGGCTGCTGGCACGTAGTTAGCCGTGGCTTTCTGGCCGGGTACCATCC  | 0.053777% | 0.020249% | 0.015190% | 0.004402% |
| V13A3151  | ATTACCGCGGCTGCTGGCACGTAGTTAGCCGGGGCTTCCTCCCGGGTACCGTCA   | 0.036430% | 0.007472% | 0.022305% | 0.006058% |
| V13A12977 | ATTACCGCGGCTGCTGGCACGTAGTTTGCCGGGGCTTTCTTACAGGGTACCGTCA  | 0.052417% | 0.014943% | 0.031909% | 0.010334% |
| V13A5881  | ATTACCGCGGCTGCTGGCACGTAGTTAGCCGTGGCTTTCTCATAAGGTACCGTCA  | 0.016214% | 0.008069% | 0.020589% | 0.016465% |
| V13A10500 | ATTACCGCGGCTGCTGGCACGTAGTTAGCCGGTGCTTTTTCTTCAGGTACAGTCA  | 0.078412% | 0.043324% | 0.006887% | 0.003956% |
| V13A10983 | ATTACCGCGGCTGCTGGCACAGACTTGCCCTCCAATCGATTTTCTACGATGTTT   | 0.080918% | 0.046278% | 0.014534% | 0.011319% |
| V13A898   | ATTACCGCGGCTGCTGGCACGTAGTTAGCCGGAGCTTATTCTACAGGTACTGTCA  | 0.029731% | 0.012424% | 0.025222% | 0.007326% |
| V13A15549 | ATTACCGCGGCTGCTGGCACGTAGTTAGCCGTGGCTTCCTCCACAGGTACCGTCA  | 0.026858% | 0.008490% | 0.032291% | 0.009624% |
| V13A7345  | ATTACCGCGGCTGCTGGCACGTAGTTAGCCGTGGCTTCCTCATAGAGTACCGTCA  | 0.022928% | 0.007574% | 0.020358% | 0.007260% |
| V13A891   | ATTACCGCGGCTGCTGGCACGTAGTTAGCCGTGGCTTCCTCCTCGGCTACCGTCA  | 0.036611% | 0.009178% | 0.034439% | 0.006284% |
| V13A6662  | ATTACCGCGGCTGCTGGCACATAGTTAGCCGGGGCTTCCTCCTTAGGTACCGTCC  | 0.044603% | 0.023166% | 0.011930% | 0.009106% |
| V13A9295  | ATTACCGCGGCTGCTGGCACGTAGTTAGCCGGGGCTTCTTGGTCAGGTACTGTCA  | 0.051382% | 0.027241% | 0.041841% | 0.018106% |
| V13A1755  | ATTACCGCGGCTGCTGGCACGTAGTTAGCCGGAGCTTTCTTTGAGAGTACCGTCA  | 0.020840% | 0.012361% | 0.016154% | 0.007961% |
| V13A10871 | ATTACCGCGGCTGCTGGCACGTAGTTAGCCGTGGCTTCCTCTCGGGGTACCGTCA  | 0.016564% | 0.005429% | 0.041233% | 0.014454% |
| V13A796   | ATTACCGCGGCTGCTGGCACGTAGTTAGCCGGGGCTTCTTATTACAGGTACTGTCC | 0.022414% | 0.011375% | 0.037062% | 0.022371% |
| V13A15271 | ATTACCGCGGCTGCTGGCACGTAGTTAGCCGGGGCTTCTGGTATGGTACCATCA   | 0.014182% | 0.003150% | 0.022463% | 0.007969% |
| V13A8834  | ATTACCGCGGCTGCTGGCACGTAGTTAGCCGGGGCTTCCTCCTTATCTACCGTCC  | 0.013736% | 0.003296% | 0.025045% | 0.006099% |

|           |                                                          |           |           |           |           |
|-----------|----------------------------------------------------------|-----------|-----------|-----------|-----------|
| V13A4197  | ATTACCGCGGCTGCTGGCACGTAGTTAGCCGGGGCTTCCTCCTATGGTACCGTCA  | 0.019243% | 0.006796% | 0.012163% | 0.003426% |
| V13A5096  | ATTACCGCGGCTGCTGGCACGTAGTTAGCCGGAGCTTTCTTGTAAGGTACCGTCA  | 0.036034% | 0.020671% | 0.010242% | 0.006379% |
| V13A43    | ATTACCGCGGCTGCTGGCACGTAGTTAGCCGGAGCTTCCTCCTGGGTACCGTCC   | 0.023751% | 0.005714% | 0.034562% | 0.011650% |
| V13A5077  | ATTACCGCGGCTGCTGGCACGTAGTTAGCCGGGGCTTCTGGTCGGGTACCGTCT   | 0.035028% | 0.010758% | 0.030455% | 0.014709% |
| V13A5836  | ATTACCGCGGCTGCTGGCACGTAGTTAGCCGTGGCTTATTCATCAAGTACCGTCA  | 0.025025% | 0.013283% | 0.020907% | 0.005675% |
| V13A10710 | ATTACCGCGGCTGCTGGCACGTAGTTAGCCGGAGCTTATTCATCAGGTACCGTCA  | 0.017525% | 0.005941% | 0.024884% | 0.005484% |
| V13A10997 | ATTACCGCGGCTGCTGGCACGTAGTTAGCCGGGGCTTCTTAGTCAAGTACCGTCA  | 0.011053% | 0.005464% | 0.012499% | 0.007432% |
| V13A4643  | ATTACCGCGGCTGCTGGCACGTAGTTAGCCGGGGCTTATTCAAATGGTACCGTCA  | 0.009602% | 0.004410% | 0.028518% | 0.010199% |
| V13A440   | ATTACCGCGGCTGCTGGCACGGAATTAGCCGGTCCTTATTCATAATGTACATGCA  | 0.007655% | 0.003586% | 0.037001% | 0.013589% |
| V13A6197  | ATTACCGCGGCTGCTGGCACGTAGTTAGCCGTGGCTTGCTCCTTAGCTACCGTCA  | 0.015500% | 0.005806% | 0.020753% | 0.011307% |
| V13A6942  | ATTACCGCGGCTGCTGGCACGTAGTTAGCCGTGACTTTCTCACAAGGTACCGTCA  | 0.034621% | 0.016264% | 0.019691% | 0.005559% |
| V13A5387  | ATTACCGCGGCTGCTGGCACGTAGTTAGCCGTGACTTTCTCACAGGGTACCGTCA  | 0.034370% | 0.013810% | 0.011291% | 0.005045% |
| V13A6299  | ATTACCGCGGCTGCTGGCACGTAGTTAGCCGGGGCTTCCTCCTTAGGTACTGTCC  | 0.025375% | 0.008070% | 0.007418% | 0.003443% |
| V13A2809  | ATTACCGCGGCTGCTGGCACGTAGTTAGCCGGGGCTTCTTACTCAGGTACCGTCC  | 0.009345% | 0.004964% | 0.039442% | 0.021069% |
| V13A2594  | ATTACCGCGGCTGCTGGCACGTAGTTAGCCGGGGCTTTCTGGTAAAGTACCGTCA  | 0.039965% | 0.016541% | 0.015578% | 0.006088% |
| V13A13703 | ATTACCGCGGCTGCTGGCACGTAGTTAGCCGGGGCTTCTTACTCAGGTACTGTCT  | 0.026908% | 0.011801% | 0.032807% | 0.019146% |
| V13A6109  | ATTACCGCGGCTGCTGGCACGTAGTTAGCCGTGGCTTTCTATTCCGGTACCGTCA  | 0.008010% | 0.004364% | 0.030545% | 0.017169% |
| V13A10328 | ATTACCGCGGCTGCTGGCACGTAGTTAGCCGGAGCTTCCTCTTTGGGTACCGTCC  | 0.024979% | 0.009250% | 0.027026% | 0.007568% |
| V13A9008  | ATTACCGCGGCTGCTGGCACTGAATTAGCCGGTCCTTATTCATAAGGTACATGCA  | 0.007492% | 0.003282% | 0.024375% | 0.006770% |
| V13A8732  | ATTACCGCGGCTGCTGGCACGTAGTTAGCCGTGGCTTATTCGAGGGGTACCGTCT  | 0.018118% | 0.006179% | 0.035035% | 0.011855% |
| V13A11770 | ATTACCGCGGCTGCTGGCACGTAGTTAGCCGGAGCTTTCTTGCAAGGTACCGTCA  | 0.023739% | 0.008282% | 0.021476% | 0.008118% |
| V13A12847 | ATTACCGCGGCTGCTGGCACGTAGTTAGCCGTGGCTTCTTCTGCAGGTACCGTCC  | 0.019730% | 0.008034% | 0.005424% | 0.002490% |
| V13A1325  | ATTACCGCGGCTGCTGGCACGTAGTTAGCCGTGGCTTTCTTATAGAGTACCGTCA  | 0.025109% | 0.015889% | 0.006048% | 0.003057% |
| V13A8060  | ATTACCGCGGCTGCTGGCACGTAGTTAGCCGGAGCTTATTCGACAGGTACCGTCT  | 0.025726% | 0.009599% | 0.018886% | 0.005481% |
| V13A1489  | ATTACCGCGGCTGCTGGCACGTAGTTAGCCGTGGCTTATTCCTATGGTACCGTCA  | 0.014739% | 0.004344% | 0.029426% | 0.012108% |
| V13A2667  | ATTACCGCGGCTGCTGGCACGGAGTTAGCCGATCCTTATTCGTAATACTTTCA    | 0.010758% | 0.004299% | 0.015782% | 0.007241% |
| V13A9569  | ATTACCGCGGCTGCTGGCACGTAGTTAGCCGGGGCTTCTTATTTAGGTACCGTCA  | 0.011880% | 0.003198% | 0.035201% | 0.006789% |
| V13A6720  | ATTACCGCGGCTGCTGGCACGTAGTTAGCCGGAGCTTATTCTACAGGTACCGTCA  | 0.031759% | 0.013225% | 0.004635% | 0.003001% |
| V13A14908 | ATTACCGCGGCTGCTGGCACGTAGTTAGCCGGGGCTTCCTCCTAAGATAACCGTCT | 0.012608% | 0.006515% | 0.013748% | 0.004029% |
| V13A4443  | ATTACCGCGGCTGCTGGCACGTAGTTAGCCGTGACTTTCTGGCGGGCACCATCA   | 0.007076% | 0.003472% | 0.014894% | 0.004772% |

|           |                                                         |           |           |           |           |
|-----------|---------------------------------------------------------|-----------|-----------|-----------|-----------|
| V13A14335 | ATTACCGCGGCTGCTGGCACGTAGTTAGCCGGGACTTCTTAGTCAGGTACCGTCT | 0.018661% | 0.006413% | 0.010476% | 0.003577% |
| V13A5932  | ATTACCGCGGCTGCTGGCACGTAGTTAGCCGTGGCTTATTCGTTGAGTACCGTCA | 0.013105% | 0.005328% | 0.010479% | 0.003787% |
| V13A13046 | ATTACCGCGGCTGCTGGCACGTAGTTAGCCGTGGCTTCTCTTTAGTACCGTCA   | 0.012333% | 0.006379% | 0.002226% | 0.001167% |
| V13A4925  | ATTACCGCGGCTGCTGGCACGGAGTTAGCCGGTGCTTCTTTGGAGGTACCGTCA  | 0.016434% | 0.006657% | 0.015510% | 0.009006% |
| V13A12537 | ATTACCGCGGCTGCTGGCACGTAGTTAGCCGTGGCTTCTCTATGGTACCGTCA   | 0.015953% | 0.007490% | 0.013838% | 0.004103% |
| V13A14350 | ATTACCGCGGCTGCTGGCACGGAGTTAGCCGATGCTTATTCATAAGGTACAGGCA | 0.008372% | 0.003558% | 0.013195% | 0.005612% |
| V13A8893  | ATTACCGCGGCTGCTGGCACGTAGTTAGCCGGAGCTTCTTACAGGTACAGTCT   | 0.021960% | 0.007652% | 0.004778% | 0.002655% |
| V13A8818  | ATTACCGCGGCTGCTGGCACGTAGTTAGCCGGGGCTTCTTCTGCAGGTACCGTCA | 0.024806% | 0.015418% | 0.005160% | 0.003560% |
| V13A7459  | ATTACCGCGGCTGCTGGCACGTAGTTAGCCGTGGCTTATTCTTACGGTACCGTCA | 0.021019% | 0.004235% | 0.010870% | 0.003210% |
| V13A8406  | ATTACCGCGGCTGCTGGCACGGAATTAGCCAGTCCTTATTCATGCGGTACCTGCA | 0.036337% | 0.033393% | 0.002346% | 0.001583% |
| V13A646   | ATTACCGCGGCTGCTGGCACGTAGTTAGCCGGGGCTTCTTATTCGGGTACTGTCA | 0.021769% | 0.011788% | 0.010363% | 0.004330% |
| V13A7019  | ATTACCGCGGCTGCTGGCACGTAGTTAGCCGGGGCTTCTTCTTGGCTACCATCA  | 0.000000% | 0.000000% | 0.007675% | 0.003669% |
| V13A10250 | ATTACCGCGGCTGCTGGCACGTAGTTAGCCGTGGCTTCTCATAGGGTACCGTCA  | 0.017992% | 0.005289% | 0.011708% | 0.003291% |
| V13A6419  | ATTACCGCGGCTGCTGGCACGTAGTTAGCCGTGGCTTCTTCCCCGCTACCGTCA  | 0.004748% | 0.001787% | 0.006222% | 0.003641% |
| V13A12462 | ATTACCGCGGCTGCTGGCACGTAGTTAGCCGGGGCTTATTCAAAGGTACCGTCA  | 0.015194% | 0.003495% | 0.006856% | 0.002210% |
| V13A5524  | ATTACCGCGGCTGCTGGCACGTAGTTAGCCGGAGCTTATTCTACAGGTACTGTCC | 0.004238% | 0.002163% | 0.012738% | 0.009043% |
| V13A6490  | ATTACCGCGGCTGCTGGCACGTAGTTAGCCGTGGCTTCTCTTGGCTACCGTCA   | 0.018236% | 0.007099% | 0.004117% | 0.002450% |
| V13A12317 | ATTACCGCGGCTGCTGGCACGTATTTAGCCGGAGCTTCTTCTTCAAGTACCGTCA | 0.023549% | 0.012570% | 0.004609% | 0.004609% |
| V13A1324  | ATTACCGCGGCTGCTGGCACGTATTTAGCCGGGGCTTCTTACTCAGGTACCGTCA | 0.023069% | 0.021554% | 0.006115% | 0.002008% |
| V13A14079 | ATTACCGCGGCTGCTGGCACGTAGTTAGCCGTGACTTGCTTGAAGAGTACCGTCA | 0.013363% | 0.006927% | 0.003983% | 0.002425% |
| V13A1442  | ATTACCGCGGCTGCTGGCACATAGTTAGCCGGAGCTTCTCTTAGGTACTGTCA   | 0.023523% | 0.005609% | 0.001454% | 0.000962% |
| V13A9454  | ATTACCGCGGCTGCTGGCACGTAGTTAGCCGTGGCTTATTCCTAAGGTACCGTCA | 0.009082% | 0.003283% | 0.009046% | 0.005058% |
| V13A921   | ATTACCGCGGCTGCTGGCACGGAGTTAGCCGATGCTTATTCATATGGTACATACA | 0.005437% | 0.002401% | 0.007091% | 0.005284% |
| V13A10879 | ATTACCGCGGCTGCTGGCACGTAGTTAGCCGTGGCTTCTTTACAGGTACCGTCA  | 0.004443% | 0.002778% | 0.003568% | 0.001188% |
| V13A15163 | ATTACCGCGGCTGCTGGCACGTAGTTTGCCGGGGCTTCTCATTAGGTACCGTCT  | 0.014180% | 0.007245% | 0.001151% | 0.000774% |
| V13A4944  | ATTACCGCGGCTGCTGGCACAGAGTTAGCCGTCTCTTCTTGTGGTACTATCT    | 0.005727% | 0.002840% | 0.004793% | 0.003255% |
| V13A12243 | ATTACCGCGGCTGCTGGCACGTATTTAGCCGGGGCTTCTTAGTCAGGTACCGTCT | 0.010962% | 0.003740% | 0.001745% | 0.001158% |
| V13A13994 | ATTACCGCGGCTGCTGGCACGTAGTTAGCCGGGGCTTCTTGGTCAGGTACCGTCA | 0.007742% | 0.002778% | 0.002285% | 0.001145% |

ESM Table 3. Effects of vertical sleeve gastrectomy (VSG) and sham operation in the diabetic Goto-Kakizaki rat on plasma bile acid concentration. Mass spectrometry method was used to determine the plasma concentration of bile acids. Data are means  $\pm$  SEM.

|                                                                                                          | VSG                   | Sham                 | P     |
|----------------------------------------------------------------------------------------------------------|-----------------------|----------------------|-------|
| BA01 Ursocholic acid (nmol/l)                                                                            | 196.70 $\pm$ 14.20    | 141.76 $\pm$ 13.56   | 0.018 |
| BA04 3-Ketocholic acid (nmol/l)                                                                          | 2.00 $\pm$ 0.92       | 1.28 $\pm$ 0.59      | 0.521 |
| BA06 Isolithocholic acid (nmol/l)                                                                        | 7.65 $\pm$ 1.59       | 7.44 $\pm$ 0.97      | 0.913 |
| BA15 8(14),(5 $\beta$ )-Cholenic acid-3a, 12a-diol (nmol/l)                                              | 5.60 $\pm$ 1.93       | 2.00 $\pm$ 0.28      | 0.110 |
| BA16 5 $\beta$ -Cholenic acid-7a-ol-3-one (nmol/l)                                                       | 52.85 $\pm$ 33.36     | 12.96 $\pm$ 4.30     | 0.271 |
| BA17 5a-Cholanic acid-3a-ol-6-one (nmol/l)                                                               | 71.80 $\pm$ 31.37     | 31.60 $\pm$ 11.68    | 0.260 |
| BA19 3a-hydroxy-12 ketolithocholic acid (5 $\beta$ -cholanic acid-3a-ol-12-one) (nmol/l)                 | 50.55 $\pm$ 23.87     | 19.84 $\pm$ 6.85     | 0.251 |
| BA20 Murocholic acid (nmol/l)                                                                            | 81.90 $\pm$ 54.15     | 13.36 $\pm$ 6.05     | 0.251 |
| BA22 5 $\beta$ -Cholanic acid-3 $\beta$ , 12a-diol (nmol/l)                                              | 23.75 $\pm$ 14.95     | 5.84 $\pm$ 4.90      | 0.293 |
| BA23 Deoxycholic acid (nmol/l)                                                                           | 387.00 $\pm$ 202.43   | 106.96 $\pm$ 51.67   | 0.216 |
| BA24 Chenodeoxycholic acid (nmol/l)                                                                      | 1798.1 $\pm$ 527.47   | 1113.76 $\pm$ 317.88 | 0.287 |
| BA25 Hyodeoxycholic acid (nmol/l)                                                                        | 173.25 $\pm$ 71.84    | 78.96 $\pm$ 19.03    | 0.241 |
| BA29 5 $\beta$ -Cholanic acid-3a, 6a-diol-7-one (nmol/l)                                                 | 94.90 $\pm$ 31.35     | 75.84 $\pm$ 14.73    | 0.591 |
| BA30 3-Dehydrocholic acid (nmol/l)                                                                       | 94.00 $\pm$ 31.20     | 74.96 $\pm$ 14.71    | 0.589 |
| BA31 12--Dehydrocholic acid (nmol/l)                                                                     | 482.35 $\pm$ 183.57   | 366.64 $\pm$ 128.07  | 0.621 |
| BA32 Ursodeoxycholic acid (nmol/l)                                                                       | 36.45 $\pm$ 23.53     | 11.12 $\pm$ 8.88     | 0.340 |
| BA33 omega-Muricholic acid (nmol/l)                                                                      | 734.30 $\pm$ 264.92   | 454.4 $\pm$ 135.18   | 0.371 |
| BA34 $\beta$ -Muricholic acid (nmol/l)                                                                   | 1005.15 $\pm$ 382.91  | 570.56 $\pm$ 130.72  | 0.312 |
| BA35 Cholic acid (nmol/l)                                                                                | 6558.80 $\pm$ 1584.18 | 6336 $\pm$ 1209.34   | 0.905 |
| BA36 Hyocholic acid (nmol/l)                                                                             | 36.40 $\pm$ 9.71      | 18.08 $\pm$ 5.73     | 0.129 |
| BA37 alpha-Muricholic acid (nmol/l)                                                                      | 429.15 $\pm$ 153.49   | 205.28 $\pm$ 64.19   | 0.210 |
| BA39 Glycolithocholic acid (5 $\beta$ -Cholanic acid-3a-ol N-N-(carboxymethyl)-amide) (nmol/l)           | 1.10 $\pm$ 0.20       | 1.04 $\pm$ 0.09      | 0.791 |
| BA40 Glycohyodeoxycholic acid (5 $\beta$ -Cholanic acid-3a, 6a-diol N-N-(carboxymethyl)- (nmol/l)        | 80.95 $\pm$ 41.78     | 29.04 $\pm$ 13.46    | 0.271 |
| BA41 Glycochenodeoxycholic acid (nmol/l)                                                                 | 32.70 $\pm$ 13.82     | 18.16 $\pm$ 6.64     | 0.369 |
| BA42 Glycodeoxycholic acid (nmol/l)                                                                      | 44.80 $\pm$ 26.55     | 30.48 $\pm$ 12.88    | 0.637 |
| BA43 Glycoursodeoxycholic acid (5 $\beta$ -Cholanic acid-3a,7 $\beta$ -diol-N-(carboxymethyl) (nmol/l)   | 81.30 $\pm$ 41.91     | 29.76 $\pm$ 13.78    | 0.266 |
| BA47 Tauro-ursocholic acid (5 $\beta$ -Cholanic acid N-(2-sulphoethyl)-amide) (nmol/l)                   | 6.45 $\pm$ 0.24       | 6.48 $\pm$ 0.43      | 0.952 |
| BA49 Glycohyocholic acid (nmol/l)                                                                        | 177.50 $\pm$ 58.55    | 93.28 $\pm$ 46.99    | 0.291 |
| BA50 Tauro-ursodeoxycholic acid (5 $\beta$ -Cholanic acid-3a,7 $\beta$ -diol N-(2-sulphoethyl)- (nmol/l) | 227.80 $\pm$ 78.80    | 35.76 $\pm$ 20.74    | 0.046 |
| BA58 Tauro omega-Muricholic acid sodium salt (nmol/l)                                                    | 118.30 $\pm$ 26.23    | 157.12 $\pm$ 111.61  | 0.747 |
| BA59 Taurocholic acid (nmol/l)                                                                           | 403.70 $\pm$ 106.16   | 167.30 $\pm$ 42.17   | 0.069 |
| BA48 Tauroolithocholic acid (5 $\beta$ -Cholanic acid-3a-ol-N-(2-sulphoethyl)-amide) (nmol/l)            | 1.75 $\pm$ 0.35       | 0.88 $\pm$ 0.20      | 0.051 |



|                                                                                            |                    |                    |       |
|--------------------------------------------------------------------------------------------|--------------------|--------------------|-------|
| BA51 Taurohyodeoxycholic acid(5B-Cholanic acid-3a,6a-diol N-(2-sulphoethyl)-amide (nmol/l) | 187.45 ± 66.75     | 30.24 ± 16.83      | 0.049 |
| BA52 Taurochenodeoxycholic acid (nmol/l)                                                   | 116.70 ± 36.27     | 83.92 ± 49.86      | 0.612 |
| BA53 Taurodeoxycholic acid (nmol/l)                                                        | 78.65 ± 34.27      | 10.72 ± 6.20       | 0.091 |
| Total bile acids (nmol/l)                                                                  | 13881.80 ± 3837.74 | 10309.36 ± 1938.03 | 0.575 |
| Primary bile acids (nmol/l)                                                                | 10164.75 ± 2585.67 | 8507.28 ± 1503.95  | 0.771 |
| Primary bile acids (cholic acid, CA) (nmol/l)                                              | 7271.30 ± 1707.79  | 6657.04 ± 1264.47  | 0.834 |
| Primary bile acids (chenodeoxycholic acid, CDCA) (nmol/l)                                  | 1947.50 ± 562.52   | 1215.84 ± 289.27   | 0.355 |
| Primary bile acids (muricholic acid, MCAb) (nmol/l)                                        | 1123.45 ± 403.09   | 727.68 ± 116.74    | 0.468 |
| Secondary bile acids (nmol/l)                                                              | 1310.80 ± 527.12   | 472.00 ± 164.15    | 0.249 |
| Secondary bile acids (deoxycholic acid, DCA) (nmol/l)                                      | 871.15 ± 382.50    | 257.36 ± 102.16    | 0.244 |
| Secondary bile acids (lithocholic acid, LCA) (nmol/l)                                      | 10.50 ± 2.08       | 9.36 ± 1.14        | 0.694 |
| Secondary bile acids (muricholic acid, MCAa) (nmol/l)                                      | 429.15 ± 153.49    | 205.28 ± 64.19     | 0.294 |
| Ursoconjugated (nmol/l)                                                                    | 345.55 ± 136.45    | 76.64 ± 41.83      | 0.160 |
| Glycoconjugated (nmol/l)                                                                   | 159.90 ± 82.18     | 79.44 ± 33.00      | 0.475 |
| Tauroconjugated (nmol/l)                                                                   | 1134.35 ± 331.55   | 452.48 ± 138.86    | 0.154 |
| MCA/CA                                                                                     | 0.15 ± 0.02        | 0.12 ± 0.02        | 0.382 |
| Primary/Secondary                                                                          | 9.47 ± 1.51        | 26.31 ± 8.24       | 0.033 |

ESM Table 4. Effects of enhanced *P. copri* in the gut microbiota of diabetic Goto Kakizaki rats on the plasma levels of bile acids. Mass spectrometry method was used to determine the plasma concentration of bile acids in Goto-Kakizaki rats inoculated with gut microbiota (GM) from sleeve operated and sham GK, treated with a mixture of kanamycin and vancomycin antibiotics or inoculated with *Prevotella Copri*. ND, Not Detected. Data are means  $\pm$  SEM.

|                                                                                                  | GM Transfer         | Controls          | P     | Antibiotics       | Controls              | P     | <i>P. Copri</i>         | Controls            | P     |
|--------------------------------------------------------------------------------------------------|---------------------|-------------------|-------|-------------------|-----------------------|-------|-------------------------|---------------------|-------|
| Lithocholic acid (nmol/l)                                                                        | 20.00 $\pm$ 5.09    | 6.18 $\pm$ 0.59   | 0.053 | 4.36 $\pm$ 0.17   | 16.37 $\pm$ 1.05      | 0.006 | 12.18 $\pm$ 1.81        | 10.90 $\pm$ 4.97    | 0.827 |
| BA01 Ursocholic acid (nmol/l)                                                                    | 27.70 $\pm$ 3.73    | 14.28 $\pm$ 2.88  | 0.025 | 7.88 $\pm$ 0.89   | 10.23 $\pm$ 0.66      | 0.077 | 10.70 $\pm$ 1.04        | 7.93 $\pm$ 1.97     | 0.298 |
| 5-Cholenic acid-3 $\beta$ -ol (nmol/l)                                                           | 0.42 $\pm$ 0.12     | 0.23 $\pm$ 0.02   | 0.193 | 0.22 $\pm$ 0.04   | 0.40 $\pm$ 0.06       | 0.064 | 0.62 $\pm$ 0.15         | 0.37 $\pm$ 0.15     | 0.276 |
| Lithocholic acid (nmol/l)                                                                        | 2.16 $\pm$ 1.78     | 1.78 $\pm$ 0.05   | 0.119 | 1.48 $\pm$ 0.11   | 1.67 $\pm$ 0.09       | 0.227 | 1.78 $\pm$ 0.10         | 1.60 $\pm$ 0.15     | 0.376 |
| BA06 Isolithocholic acid (nmol/l)                                                                | 1.92 $\pm$ 0.27     | 0.55 $\pm$ 0.10   | 0.005 | 1.46 $\pm$ 0.11   | 1.43 $\pm$ 0.23       | 0.924 | 2.03 $\pm$ 0.50         | 2.00 $\pm$ 0.42     | 0.961 |
| 3a,12a, 23-Nordeoxycholic acid (nmol/l)                                                          | 2.06 $\pm$ 0.09     | 2.23 $\pm$ 0.15   | 0.390 | 1.60 $\pm$ 0.03   | 2.43 $\pm$ 0.30       | 0.105 | 2.10 $\pm$ 0.04         | 2.13 $\pm$ 0.17     | 0.863 |
| BA17 5a-Cholanic acid-3a-ol-6-one (nmol/l)                                                       | 22.92 $\pm$ 8.63    | 14.83 $\pm$ 6.47  | 0.478 | ND                | 29.43 $\pm$ 4.92      | 0.027 | 79.27 $\pm$ 33.23       | 29.87 $\pm$ 19.09   | 0.239 |
| BA19 3a-hydroxy-12 ketolithocholic acid (5 $\beta$ -cholanic acid-3a-ol-12-one) (nmol/l)         | 7.40 $\pm$ 3.44     | 2.85 $\pm$ 0.81   | 0.261 | 0.10 $\pm$ 0.00   | 2.27 $\pm$ 0.22       | 0.010 | 6.97 $\pm$ 1.92         | 3.83 $\pm$ 0.58     | 0.170 |
| BA20 Murocholic acid (nmol/l)                                                                    | 5.50 $\pm$ 3.14     | 1.90 $\pm$ 0.68   | 0.317 | 0.02 $\pm$ 0.02   | 3.47 $\pm$ 0.78       | 0.048 | 28.83 $\pm$ 13.97       | 5.33 $\pm$ 1.84     | 0.154 |
| BA22 5 $\beta$ -Cholanic acid-3 $\beta$ , 12a-diol (nmol/l)                                      | 7.98 $\pm$ 4.02     | 1.08 $\pm$ 0.78   | 0.162 | ND                | 1.60 $\pm$ 0.06       | 0.001 | 3.85 $\pm$ 2.05         | 5.73 $\pm$ 3.39     | 0.662 |
| BA23 Deoxycholic acid (nmol/l)                                                                   | 92.3 $\pm$ 42.67    | 23.65 $\pm$ 5.99  | 0.184 | 5.02 $\pm$ 0.12   | 22.07 $\pm$ 3.23      | 0.034 | 58.20 $\pm$ 24.91       | 46.67 $\pm$ 8.28    | 0.676 |
| BA24 Chenodeoxycholic acid (nmol/l)                                                              | 198.14 $\pm$ 143.49 | 41.93 $\pm$ 22.48 | 0.340 | 9.34 $\pm$ 2.31   | 139.43 $\pm$<br>35.65 | 0.067 | 528.22 $\pm$ 116.52     | 154.77 $\pm$ 99.72  | 0.048 |
| BA25 Hyodeoxycholic acid (nmol/l)                                                                | 222.76 $\pm$ 93.13  | 99.10 $\pm$ 42.80 | 0.277 | ND                | 136.23 $\pm$<br>35.77 | 0.063 | 658.70 $\pm$ 240.34     | 191.63 $\pm$ 100.94 | 0.120 |
| BA29 5 $\beta$ -Cholanic acid-3a, 6a-diol-7-one (nmol/l)                                         | 41.3 $\pm$ 29.64    | 11.18 $\pm$ 7.53  | 0.375 | 1.02 $\pm$ 0.87   | 37.37 $\pm$ 7.20      | 0.035 | 181.83 $\pm$ 65.19      | 56.33 $\pm$ 33.93   | 0.145 |
| BA30 3-Dehydrocholic acid (nmol/l)                                                               | 9.38 $\pm$ 8.70     | 0.68 $\pm$ 0.69   | 0.374 | ND                | 0.10 $\pm$ 0.10       | 0.423 | 14.37 $\pm$ 6.36        | 2.87 $\pm$ 2.87     | 0.146 |
| BA31 12--Dehydrocholic acid (nmol/l)                                                             | 83.1 $\pm$ 76.49    | 8.10 $\pm$ 4.81   | 0.383 | 12.84 $\pm$ 11.82 | 154.97 $\pm$<br>73.76 | 0.191 | 567.87 $\pm$ 417.97     | 46.03 $\pm$ 21.48   | 0.267 |
| BA32 Ursodeoxycholic acid (nmol/l)                                                               | 25.22 $\pm$ 18.27   | 6.15 $\pm$ 3.23   | 0.359 | 0.82 $\pm$ 0.22   | 38.30 $\pm$ 16.41     | 0.150 | 64.37 $\pm$ 21.62       | 17.03 $\pm$ 6.28    | 0.082 |
| BA33 omega-Muricholic acid (nmol/l)                                                              | 80.9 $\pm$ 54.53    | 28.18 $\pm$ 20.38 | 0.406 | 1.28 $\pm$ 0.88   | 41.97 $\pm$ 9.00      | 0.044 | 235.20 $\pm$ 67.04      | 29.35 $\pm$ 8.45    | 0.027 |
| BA35 Cholic acid (nmol/l)                                                                        | 562 $\pm$ 349.06    | 210.42            | 0.507 | 9.42 $\pm$ 5.13   | 276.03 $\pm$<br>72.61 | 0.066 | 1130.22 $\pm$<br>213.96 | 217.60 $\pm$ 20.20  | 0.008 |
| BA39 Glycolithocholic acid (5 $\beta$ -Cholanic acid-3a-ol N-N-(carboxymethyl)-amide) (nmol/l)   | 0.56 $\pm$ 0.06     | 0.53 $\pm$ 0.02   | 0.612 | 0.52 $\pm$ 0.02   | 0.50 $\pm$ 0.01       | 0.374 | 0.68 $\pm$ 0.07         | 0.50 $\pm$ 0.06     | 0.095 |
| BA40 Glycohyodeoxycholic acid (5 $\beta$ -Cholanic acid-3a, 6a-diol N-N-(carboxymethyl) (nmol/l) | 4.18 $\pm$ 2.18     | 2.00 $\pm$ 1.55   | 0.444 | ND                | 14.37 $\pm$ 2.78      | 0.036 | 23.68 $\pm$ 12.23       | 15.90 $\pm$ 14.20   | 0.695 |

|                                                                                                                  |                      |                     |       |                    |                      |       |                       |                     |       |
|------------------------------------------------------------------------------------------------------------------|----------------------|---------------------|-------|--------------------|----------------------|-------|-----------------------|---------------------|-------|
| BA43 Glycoursodeoxycholic acid (5 $\beta$ -Cholanic acid-3 $\alpha$ ,7 $\beta$ -diol-N-(carboxymethyl) (nmol/l)  | 0.40 $\pm$ 0.13      | 0.23 $\pm$ 0.06     | 0.274 | 0.26 $\pm$ 0.02    | 0.50 $\pm$ 0.12      | 0.168 | 0.63 $\pm$ 0.17       | 0.37 $\pm$ 0.12     | 0.236 |
| BA47 Tauro-ursocholic acid (5 $\beta$ -Cholanic acid N-(2-sulphoethyl)-amide) (nmol/l)                           | 0.94 $\pm$ 0.13      | 0.38 $\pm$ 0.11     | 0.013 | 0.36 $\pm$ 0.04    | 0.47 $\pm$ 0.03      | 0.088 | 0.40 $\pm$ 0.04       | 0.30 $\pm$ 0.06     | 0.223 |
| BA50 Tauro-ursodeoxycholic acid (5 $\beta$ -Cholanic acid-3 $\alpha$ ,7 $\beta$ -diol N-(2-sulphoethyl) (nmol/l) | 1.30 $\pm$ 0.40      | 0.93 $\pm$ 0.25     | 0.457 | 1.80 $\pm$ 0.52    | 0.87 $\pm$ 0.37      | 0.194 | 0.80 $\pm$ 0.15       | 0.50 $\pm$ 0.21     | 0.303 |
| BA58 Tauro omega-Muricholic acid sodium salt (nmol/l)                                                            | 34.06 $\pm$ 3.29     | 29.25 $\pm$ 5.58    | 0.491 | 43.82 $\pm$ 8.50   | 30.67 $\pm$ 13.02    | 0.448 | 5.62 $\pm$ 0.59       | 6.47 $\pm$ 3.43     | 0.829 |
| BA59 Taurocholic acid (nmol/l)                                                                                   | 54.28 $\pm$ 11.01    | 57.75 $\pm$ 11.92   | 0.837 | 148.2 $\pm$ 22.19  | 76.87 $\pm$ 34.73    | 0.165 | 11.93 $\pm$ 1.84      | 15.67 $\pm$ 6.00    | 0.603 |
| Allolithocholic acid (nmol/l)                                                                                    | 0.24 $\pm$ 0.12      | 0.35 $\pm$ 0.18     | 0.622 | 0.18 $\pm$ 0.04    | 2.60 $\pm$ 0.23      | 0.008 | 0.77 $\pm$ 0.17       | 0.17 $\pm$ 0.07     | 0.016 |
| Total bile acids (nmol/l)                                                                                        | 1509.14 $\pm$ 851.83 | 631.7 $\pm$ 323.38  | 0.379 | 252.00 $\pm$ 39.78 | 1042.60 $\pm$ 214.42 | 0.062 | 3631.82 $\pm$ 1087.17 | 789.53 $\pm$ 173.30 | 0.047 |
| Primary bile acids (nmol/l)                                                                                      | 889.78 $\pm$ 532.15  | 415.58 $\pm$ 236.84 | 0.450 | 211.80 $\pm$ 32.53 | 560.37 $\pm$ 106.70  | 0.071 | 1857.82 $\pm$ 372.38  | 378.30 $\pm$ 71.14  | 0.010 |
| Primary bile acids (cholic acid, CA) (nmol/l)                                                                    | 657.58 $\pm$ 388.14  | 344.40 $\pm$ 216.37 | 0.507 | 158.64 $\pm$ 24.25 | 390.27 $\pm$ 74.36   | 0.077 | 1323.98 $\pm$ 268.46  | 217.07 $\pm$ 40.21  | 0.009 |
| Primary bile acids (chenodeoxycholic acid, CDCA) (nmol/l)                                                        | 198.14 $\pm$ 143.49  | 41.93 $\pm$ 22.48   | 0.340 | 9.34 $\pm$ 2.31    | 139.43 $\pm$ 35.65   | 0.067 | 528.22 $\pm$ 116.52   | 154.77 $\pm$ 99.72  | 0.048 |
| Primary bile acids (muricholic acid, MCAb) (nmol/l)                                                              | 34.06 $\pm$ 3.29     | 29.25 $\pm$ 5.58    | 0.491 | 43.82 $\pm$ 8.50   | 30.67 $\pm$ 13.02    | 0.448 | 5.62 $\pm$ 0.59       | 6.47 $\pm$ 3.43     | 0.824 |
| Secondary bile acids (nmol/l)                                                                                    | 337.54 $\pm$ 139.47  | 130.00 $\pm$ 49.01  | 0.220 | 11.36 $\pm$ 0.22   | 176.60 $\pm$ 38.46   | 0.050 | 731.80 $\pm$ 259.99   | 251.70 $\pm$ 98.06  | 0.133 |
| Secondary bile acids (Deoxycholic acid, DCA) (nmol/l)                                                            | 315.06 $\pm$ 134.76  | 122.75 $\pm$ 48.76  | 0.237 | 5.02 $\pm$ 0.12    | 158.30 $\pm$ 37.69   | 0.055 | 716.90 $\pm$ 258.51   | 238.30 $\pm$ 92.70  | 0.131 |
| Secondary bile acids (lithocholic acid, LCA) (nmol/l)                                                            | 2.48 $\pm$ 0.28      | 1.08 $\pm$ 0.11     | 0.005 | 1.98 $\pm$ 0.10    | 1.93 $\pm$ 0.23      | 0.867 | 2.72 $\pm$ 0.56       | 2.50 $\pm$ 0.47     | 0.777 |
| Ursoconjugated (nmol/l)                                                                                          | 26.92 $\pm$ 18.80    | 7.30 $\pm$ 3.11     | 0.359 | 2.88 $\pm$ 0.61    | 39.67 $\pm$ 16.88    | 0.161 | 65.80 $\pm$ 21.90     | 17.90 $\pm$ 6.27    | 0.082 |
| Glycoconjugated (nmol/l)                                                                                         | 0.96 $\pm$ 0.19      | 0.75 $\pm$ 0.06     | 0.341 | 0.78 $\pm$ 0.04    | 1.00 $\pm$ 0.12      | 0.189 | 1.32 $\pm$ 0.24       | 0.87 $\pm$ 0.18     | 0.171 |
| Tauroconjugated (nmol/l)                                                                                         | 89.64 $\pm$ 13.30    | 87.93 $\pm$ 17.46   | 0.940 | 193.82 $\pm$ 30.96 | 108.40 $\pm$ 48.11   | 0.216 | 18.35 $\pm$ 2.20      | 22.63 $\pm$ 7.68    | 0.639 |
| MCA/CA                                                                                                           | 0.19 $\pm$ 0.09      | 0.19 $\pm$ 0.07     | 0.940 | 0.27 $\pm$ 0.02    | 0.08 $\pm$ 0.03      | 0.006 | 0.01 $\pm$ 0.00       | 0.03 $\pm$ 0.01     | 0.203 |
| Primary/Secondary                                                                                                | 2.01 $\pm$ 0.49      | 2.67 $\pm$ 0.49     | 0.379 | 18.88 $\pm$ 3.26   | 3.42 $\pm$ 0.89      | 0.007 | 6.21 $\pm$ 2.90       | 1.92 $\pm$ 0.73     | 0.205 |

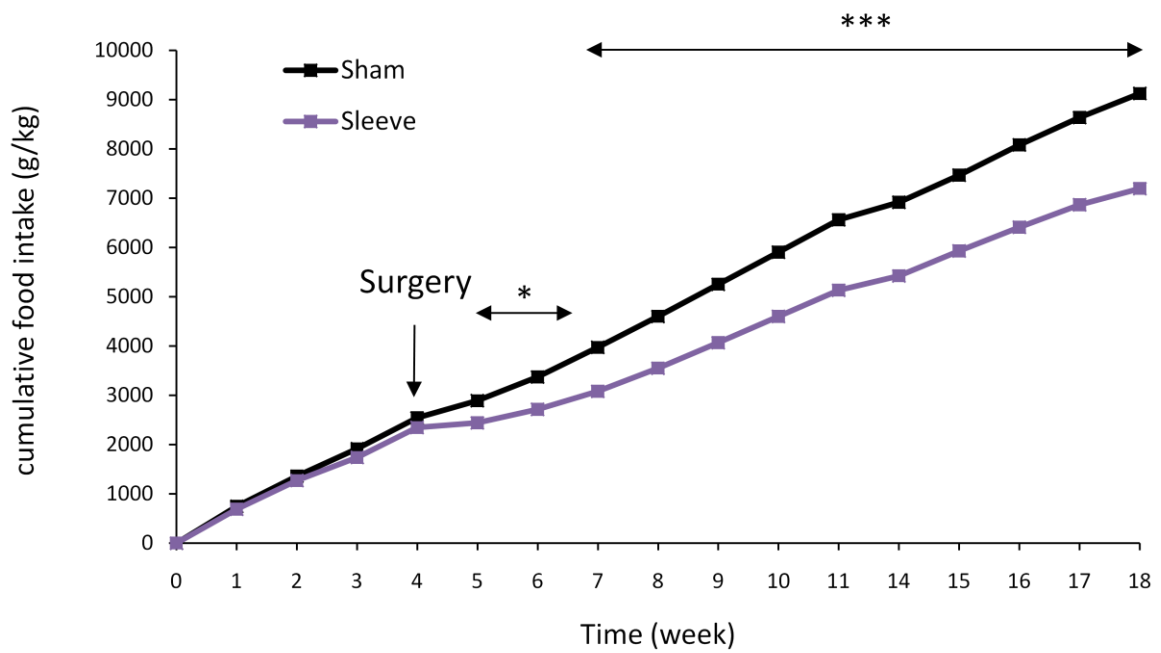

**ESM Figure 1. Food intake in Goto-Kakizaki (GK) rats following vertical sleeve gastrectomy (VSG, Sleeve) or sham operation. \*P<0.05, \*\*\*P<0.001 significant differences between VSG rats and sham controls.**

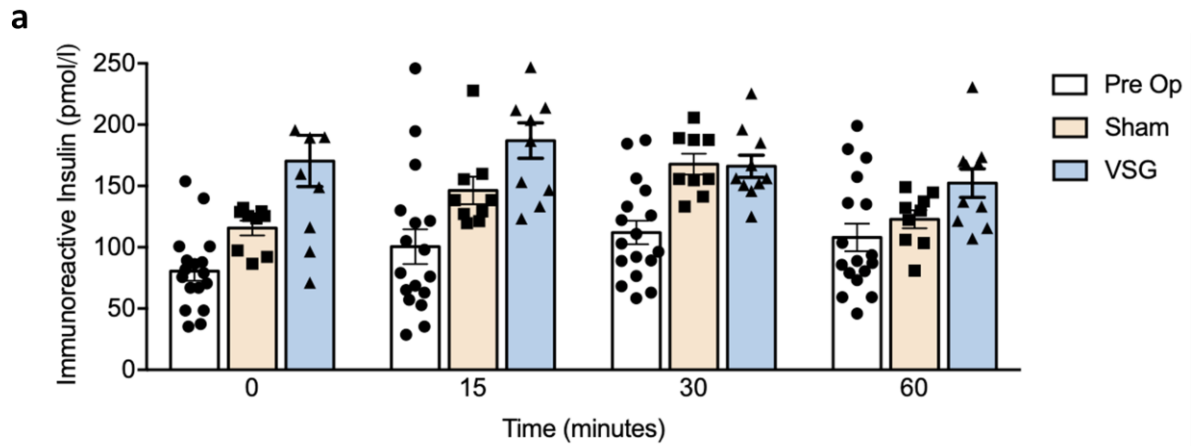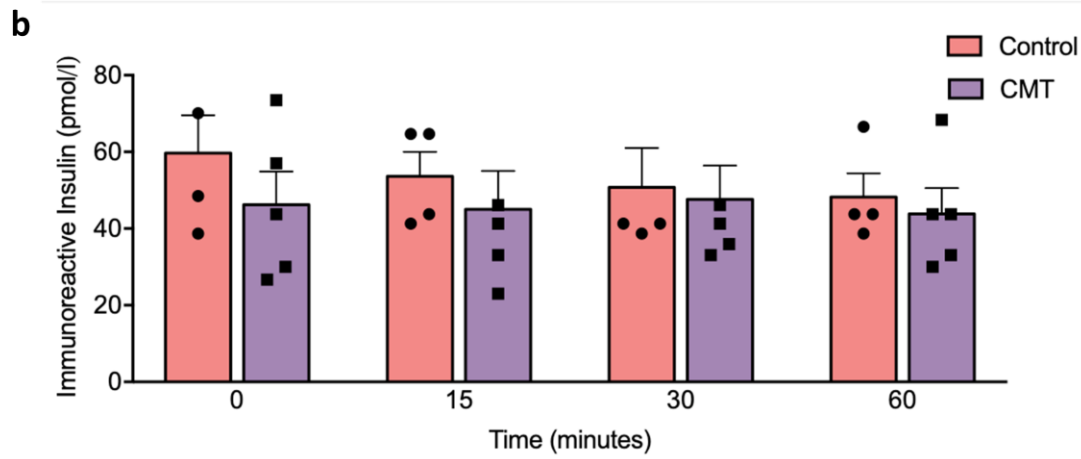

**ESM Figure 2. Effects of vertical sleeve gastrectomy and gut microbiota transfer from gastrectomised Goto-Kakizaki (GK) rats on insulin secretion.** Glucose-induced insulin secretion was determined in GK rats following vertical sleeve gastrectomy (VSG) or sham operation (a) and following inoculation of GK rats with gut microbiota from gastrectomised GK rats or sham controls (b). Insulin secretion tests (see methods) were performed following an overnight (16h) fast before VSG (Pre Op) and 91 days after VSG (n=10) or sham operation (n=9) (a), and 12 days after transfer of caecal microbiota transfer (CMT) from VSG treated GK rats (n=5) or sham operated GK rats (n=4) (b). Data are mean  $\pm$ SEM.

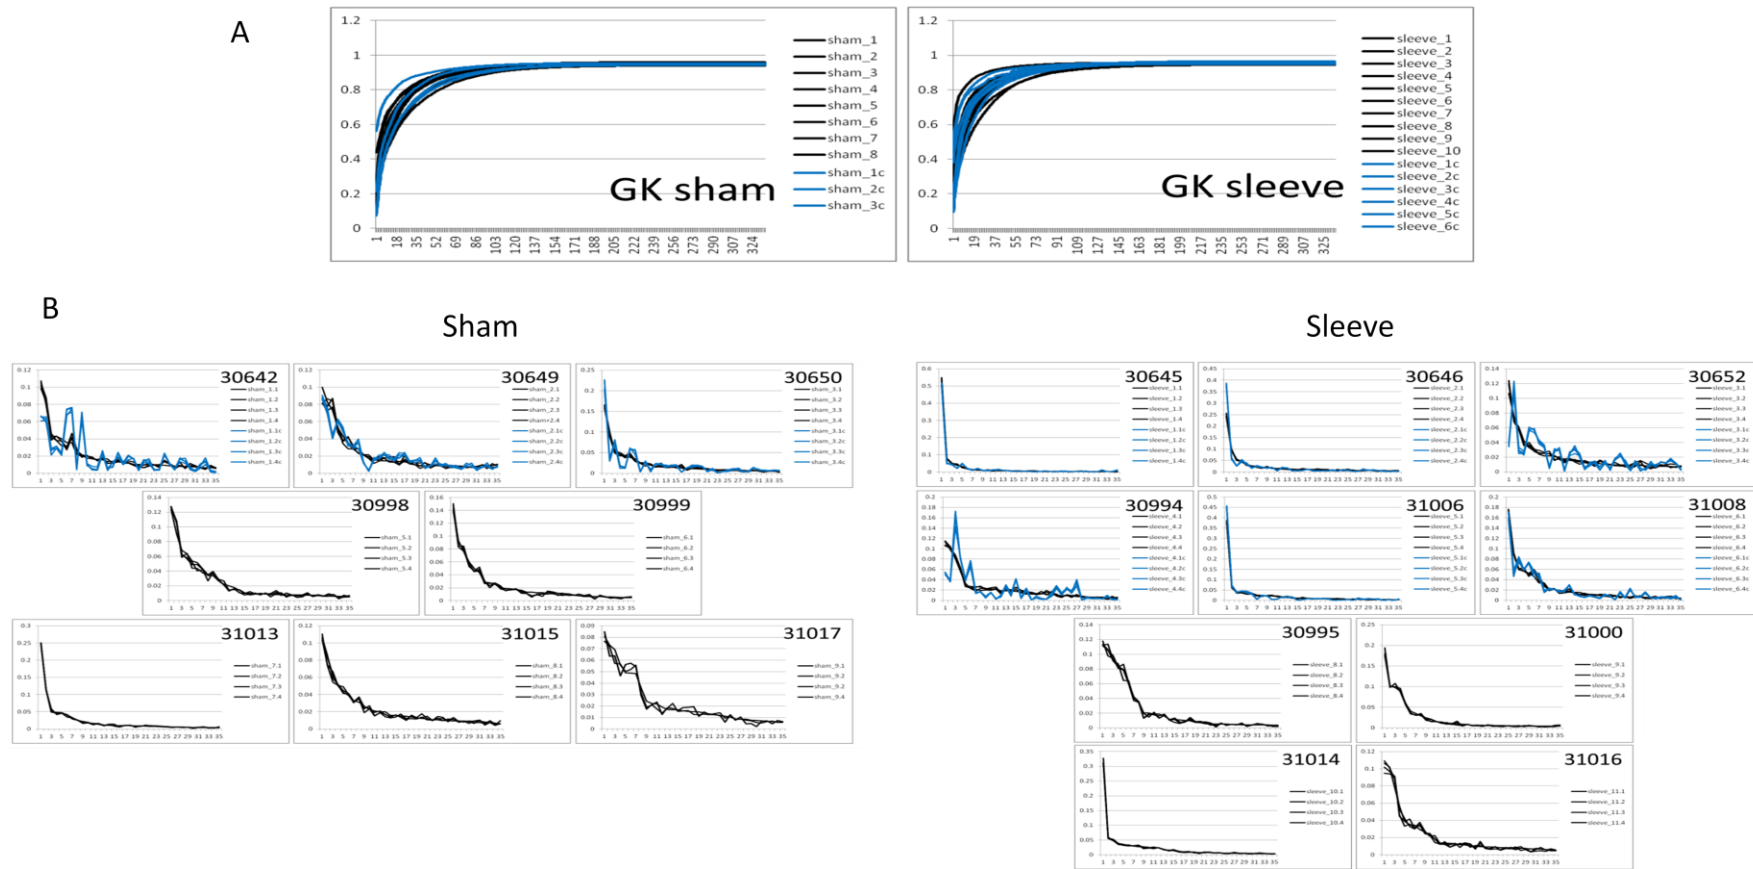

**ESM Figure 3.** Saturation curves for biological replicates (A) and technical reproducibility (B) of sequencing data in gastrectomised (vertical sleeve gastrectomy) or sham operated Goto-Kakizaki rats. Technical reproducibility was assessed across the 4 different sequencing runs for each caecum and colon sample. Data were sorted by the caecum first to 35th most common 16S 55mers. Data from caecum and colon are shown in black and blue lines, respectively.

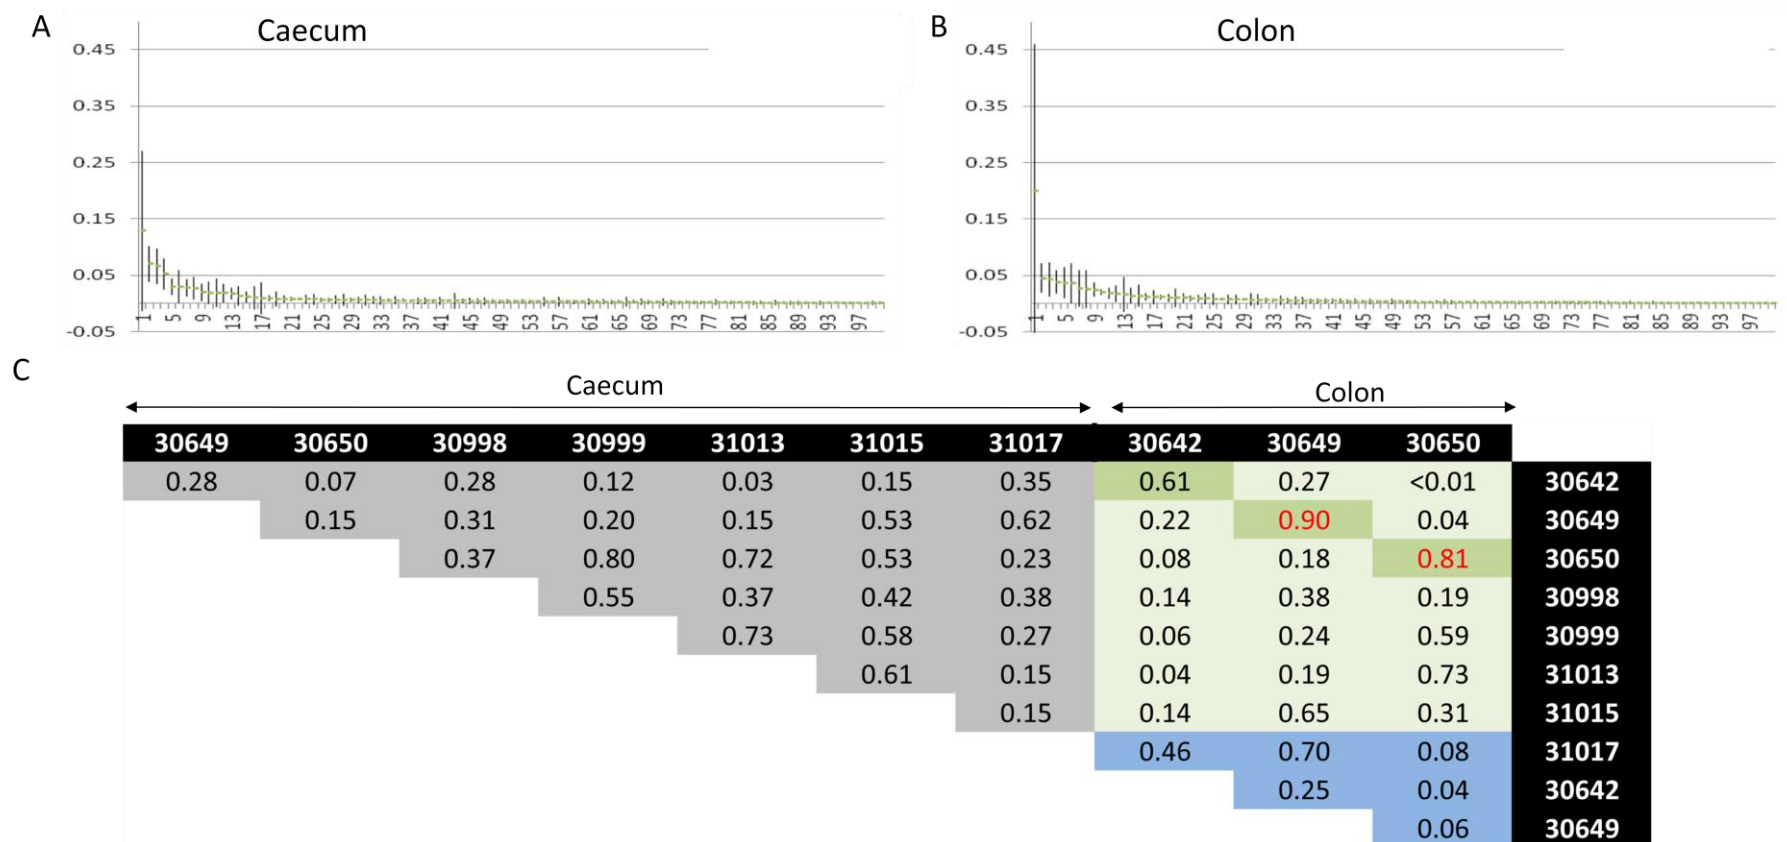

**ESM Figure 4. Reproducibility of sequencing data among biological replicates in sham operated Goto-Kakizaki rats.** Frequencies of the 100 most common 16S-rDNA sequences are plotted for caecum (A) and colon (B) datasets. Mean and standard deviation illustrate sequence data variability. The R-squared value of each biological replicate comparison was calculated to evaluate consistency of sequencing outputs between colon samples, between caecum samples and between colon and caecum samples (C). Background color in C indicates comparisons between different animals (Grey, caecum vs caecum; Blue, colon vs colon; Light green, caecum vs colon) or for the same animals (Darker green, caecum vs colon). Red text underlines R-squared value >0.75.

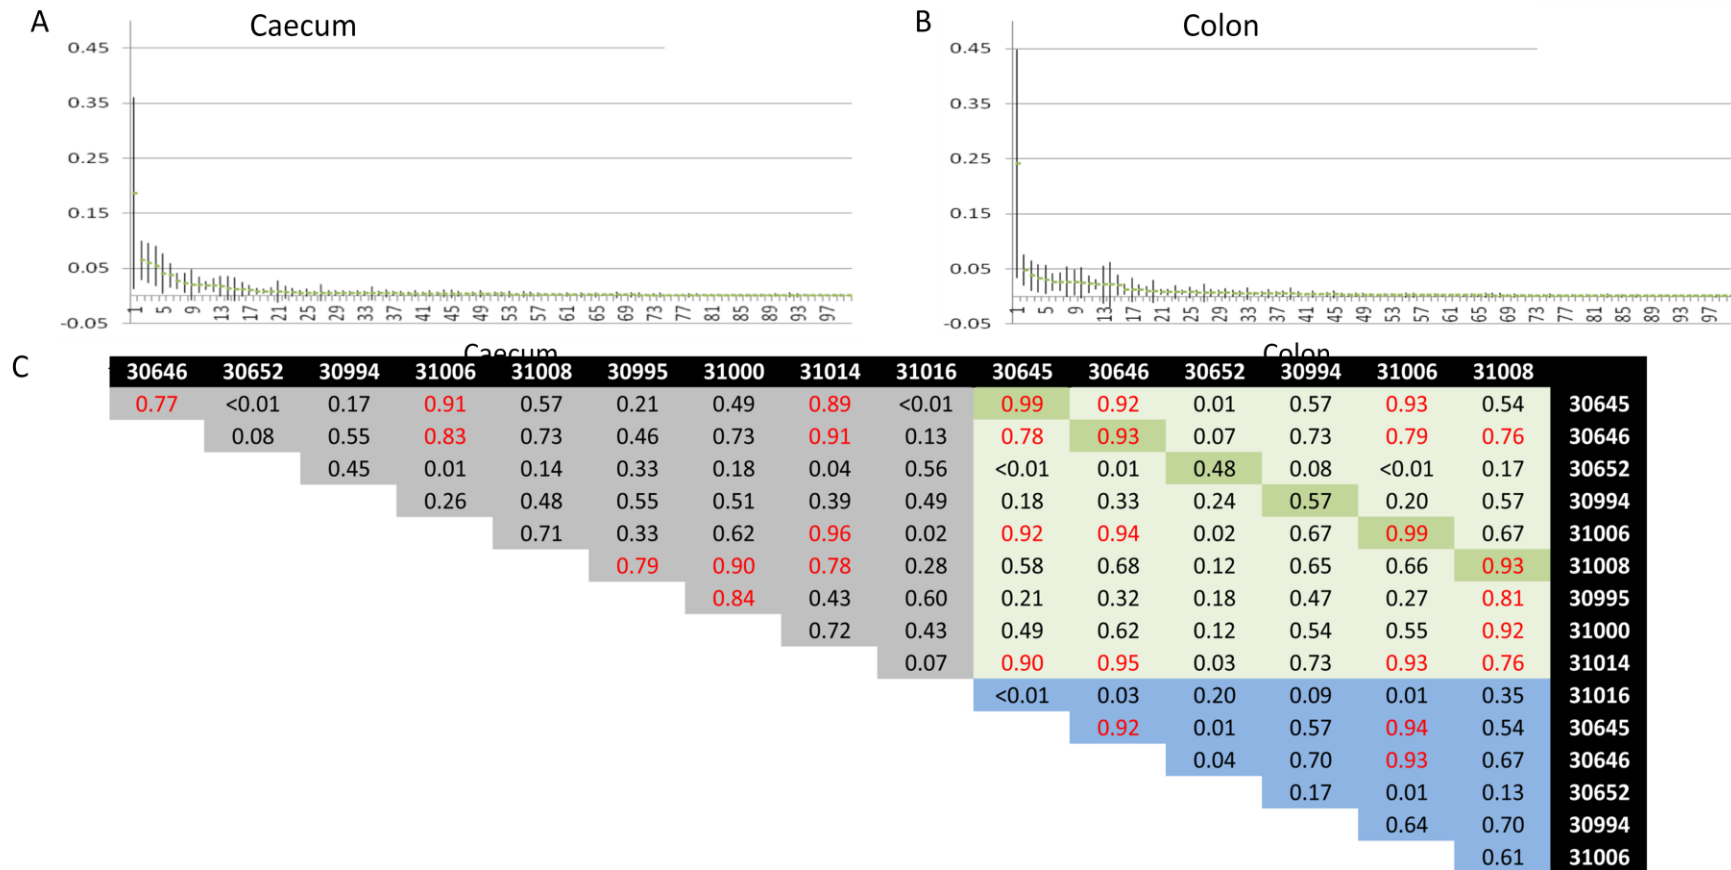

**ESM Figure 5. Reproducibility of sequencing data among biological replicates in gastrectomised (sleeve) Goto-Kakizaki rats.** Frequencies of the 100 most common 16S-rDNA sequences are plotted for caecum (A) and colon (B) datasets. Mean and standard deviation illustrate sequence data variability. The R-squared value of each biological replicate comparison was calculated to evaluate consistency of sequencing outputs between colon samples, between caecum samples and between colon and caecum samples (C). Background color in C indicates comparisons between different animals (Grey, caecum vs caecum; Blue, colon vs colon; Light green, caecum vs colon) or for the same animals (Darker green, caecum vs colon). Red text underlines R-squared value >0.75.



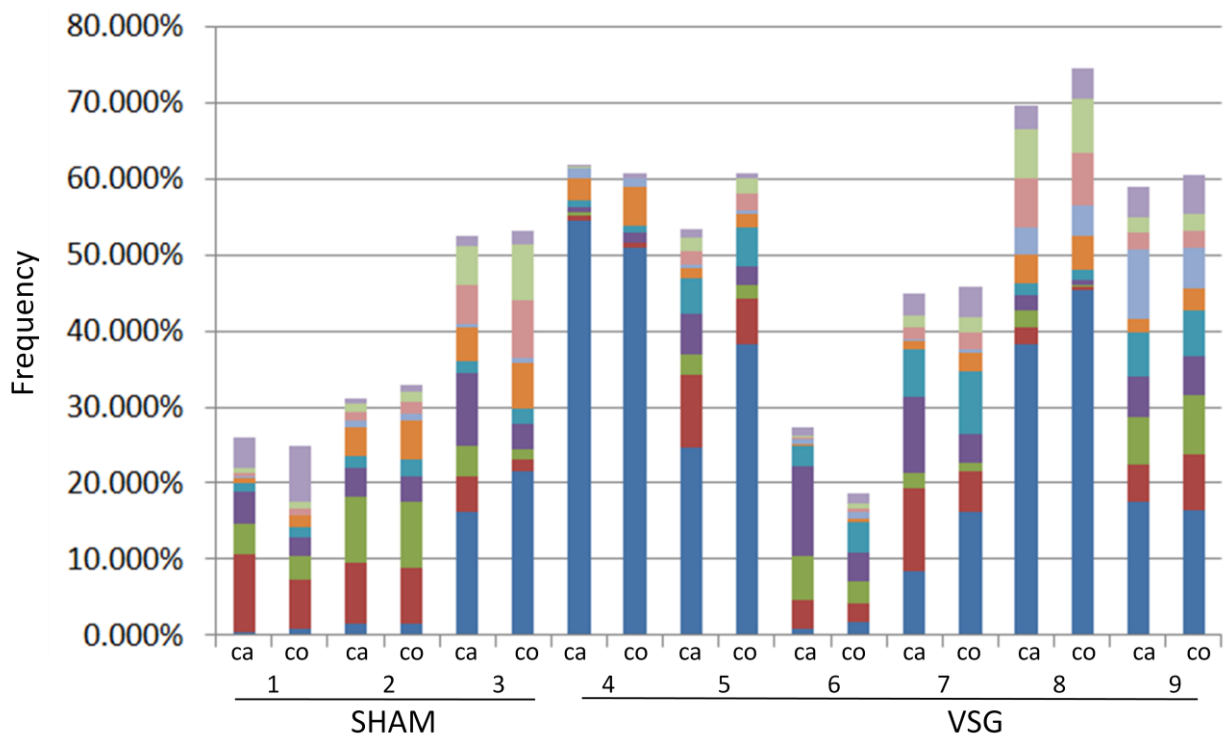

**ESM Figure 6. Reproducibility of sequencing data from paired caecum (ca) and colon (co) samples from gastrectomised (vertical sleeve gastrectomy, VSG) Goto-Kakizaki rats and sham operated controls.** rDNA motifs are color coded. Data are shown for the 10-most prevalent rDNA motifs across all samples.

|             |             |             |             |             |             |
|-------------|-------------|-------------|-------------|-------------|-------------|
| ■ V13A7759  | ■ V13A2810  | ■ V13A5897  | ■ V13A12285 | ■ V13A395   | ■ V13A6709  |
| ■ V13A14448 | ■ V13A2287  | ■ V13A14726 | ■ V13A7919  | ■ V13A5402  | ■ V13A1689  |
| ■ V13A7641  | ■ V13A4836  | ■ V13A4809  | ■ V13A7817  | ■ V13A8451  | ■ V13A9035  |
| ■ V13A9309  | ■ V13A3764  | ■ V13A2469  | ■ V13A8741  | ■ V13A15371 | ■ V13A3935  |
| ■ V13A5381  | ■ V13A399   | ■ V13A10361 | ■ V13A1694  | ■ V13A296   | ■ V13A13773 |
| ■ V13A12346 | ■ V13A13515 | ■ V13A2602  | ■ V13A7275  | ■ V13A3762  | ■ V13A15465 |
| ■ V13A13991 | ■ V13A14005 | ■ V13A6464  | ■ V13A8908  | ■ V13A3428  | ■ V13A9942  |
| ■ V13A2378  | ■ V13A12274 | ■ V13A4785  | ■ V13A12862 | ■ V13A13172 | ■ V13A13919 |
| ■ V13A14410 | ■ V13A4765  | ■ V13A4931  | ■ V13A9079  | ■ V13A4794  | ■ V13A7810  |
| ■ V13A397   | ■ V13A5701  | ■ V13A8825  | ■ V13A3265  | ■ V13A7921  | ■ V13A14225 |
| ■ V13A3045  | ■ V13A9455  | ■ V13A9476  | ■ V13A4570  | ■ V13A10016 | ■ V13A9779  |
| ■ V13A15364 | ■ V13A5861  | ■ V13A2959  | ■ V13A4574  | ■ V13A890   | ■ V13A1692  |
| ■ V13A11018 | ■ V13A6953  | ■ V13A12840 | ■ V13A12857 | ■ V13A10048 | ■ V13A12206 |
| ■ V13A7023  | ■ V13A4817  | ■ V13A2090  | ■ V13A9744  | ■ V13A6778  | ■ V13A3763  |
| ■ V13A11183 | ■ V13A2248  | ■ V13A2804  | ■ V13A2715  | ■ V13A9336  | ■ V13A12283 |
| ■ V13A10886 | ■ V13A3640  | ■ V13A13697 | ■ V13A9310  | ■ V13A234   | ■ V13A6810  |
| ■ V13A9699  | ■ V13A7528  | ■ V13A762   | ■ V13A9832  | ■ V13A12281 | ■ V13A11904 |
| ■ V13A5211  | ■ V13A14912 | ■ V13A8693  | ■ V13A9224  | ■ V13A7033  | ■ V13A6692  |
| ■ V13A2034  | ■ V13A3780  | ■ V13A795   | ■ V13A12353 | ■ V13A6268  | ■ V13A1861  |
| ■ V13A12247 | ■ V13A686   | ■ V13A13238 | ■ V13A9407  | ■ V13A4788  | ■ V13A12329 |
| ■ V13A1446  | ■ V13A10205 | ■ V13A5823  | ■ V13A6595  | ■ V13A9082  | ■ V13A7077  |
| ■ V13A13337 | ■ V13A11382 | ■ V13A12760 | ■ V13A11188 | ■ V13A5050  | ■ V13A258   |
| ■ V13A8414  | ■ V13A13323 | ■ V13A10709 | ■ V13A1236  | ■ V13A8850  | ■ V13A6064  |
| ■ V13A14699 | ■ V13A6014  | ■ V13A1661  | ■ V13A9296  | ■ V13A45    | ■ V13A603   |
| ■ V13A5419  | ■ V13A1295  | ■ V13A12979 | ■ V13A5114  | ■ V13A14865 | ■ V13A3848  |
| ■ V13A5423  | ■ V13A11648 | ■ V13A12995 | ■ V13A819   | ■ V13A13677 | ■ V13A622   |
| ■ V13A12536 | ■ V13A10103 | ■ V13A6899  | ■ V13A14039 | ■ V13A6309  | ■ V13A7383  |
| ■ V13A2225  | ■ V13A4035  | ■ V13A1207  | ■ V13A13977 | ■ V13A1323  | ■ V13A8742  |
| ■ V13A3151  | ■ V13A8297  | ■ V13A12977 | ■ V13A6520  | ■ V13A5881  | ■ V13A10500 |
| ■ V13A10983 | ■ V13A12258 | ■ V13A898   | ■ V13A15549 | ■ V13A1831  | ■ V13A2863  |
| ■ V13A12732 | ■ V13A7345  | ■ V13A891   | ■ V13A6662  | ■ V13A9295  | ■ V13A1755  |
| ■ V13A10871 | ■ V13A796   | ■ V13A15271 | ■ V13A8834  | ■ V13A4197  | ■ V13A11961 |
| ■ V13A5096  | ■ V13A43    | ■ V13A2325  | ■ V13A5077  | ■ V13A5836  | ■ V13A10710 |
| ■ V13A10997 | ■ V13A4643  | ■ V13A440   | ■ V13A6197  | ■ V13A6942  | ■ V13A3589  |
| ■ V13A5387  | ■ V13A6299  | ■ V13A2809  | ■ V13A2594  | ■ V13A13703 | ■ V13A6109  |
| ■ V13A10328 | ■ V13A9008  | ■ V13A8605  | ■ V13A8732  | ■ V13A11770 | ■ V13A5698  |
| ■ V13A12847 | ■ V13A15432 | ■ V13A1325  | ■ V13A8060  | ■ V13A13713 | ■ V13A1489  |
| ■ V13A9683  | ■ V13A2667  | ■ V13A9569  | ■ V13A6720  | ■ V13A14908 | ■ V13A15055 |
| ■ V13A13255 | ■ V13A4443  | ■ V13A14335 | ■ V13A11342 | ■ V13A5932  | ■ V13A13046 |
| ■ V13A4925  | ■ V13A12537 | ■ V13A14350 | ■ V13A8893  | ■ V13A8818  | ■ V13A7105  |
| ■ V13A12304 | ■ V13A7459  | ■ V13A8406  | ■ V13A646   | ■ V13A7091  | ■ V13A7019  |
| ■ V13A10250 | ■ V13A213   | ■ V13A6419  | ■ V13A7437  | ■ V13A3710  | ■ V13A12462 |
| ■ V13A1864  | ■ V13A5524  | ■ V13A6490  | ■ V13A12317 | ■ V13A1324  | ■ V13A14079 |

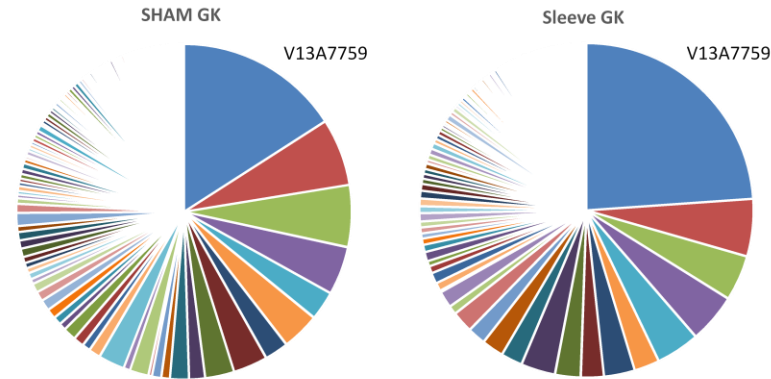

**ESM Figure 7. Distribution of 16SrDNA motifs in gastrectomised (sleeve) Goto-Kakizaki (GK) rats and sham operated GK rats.** Frequencies of the motifs acquired in caecum and colon samples in the two rat groups were merged. Sequences and frequencies of motifs in the two rat groups are given in Supplementary Table 2.

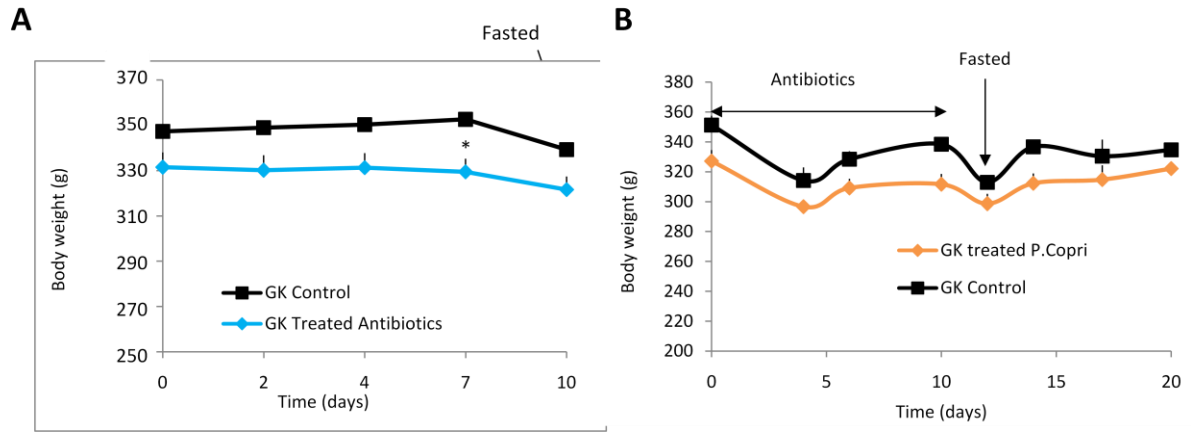

**ESM Figure 8. Body weight follow up in Goto-Kakizaki (GK) rats following *Prevotella copri* enrichment.** Rats were treated with an antibiotic cocktail allowing growth of *Prevotella copri* (A) or inoculated with either *Prevotella copri* or heat inactivated *Prevotella copri* (B).

\*P<0.05 significantly different to GK controls.

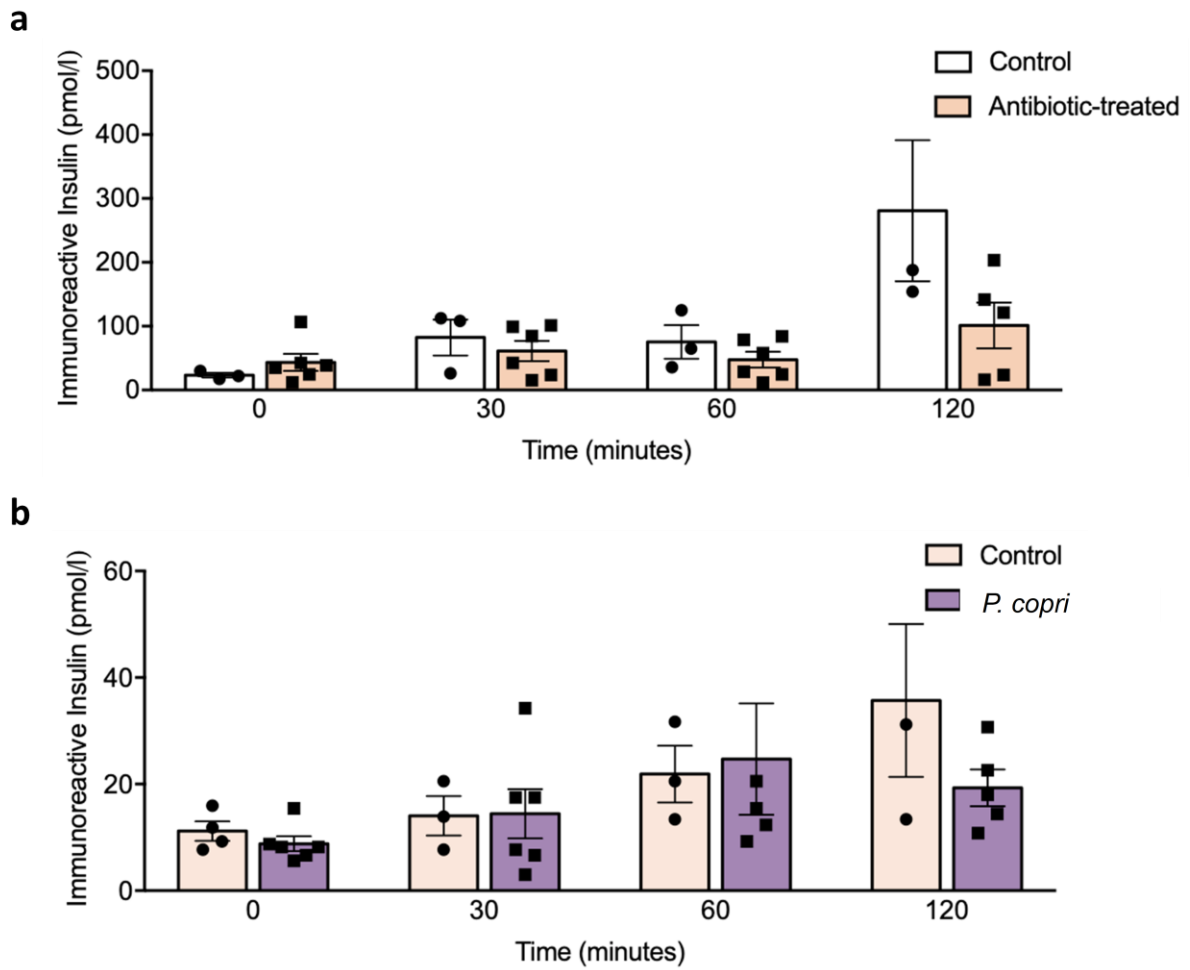

**ESM Figure 9. Effects of gut microbiota enrichment in *Prevotella Copri* on insulin secretion in Goto-Kakizaki (GK) rats.** Glucose-induced insulin secretion was determined in GK rats either treated with antibiotics permissive to *P. copri* (n=6) (a) or inoculated with *P. copri* (n=6) or heat inactivated *P. copri* (n=3) (b). Insulin secretion tests (see methods) were performed following an overnight (16h) fast 10 days after antibiotic treatment or *P. copri* inoculation. Data are mean  $\pm$  SEM.

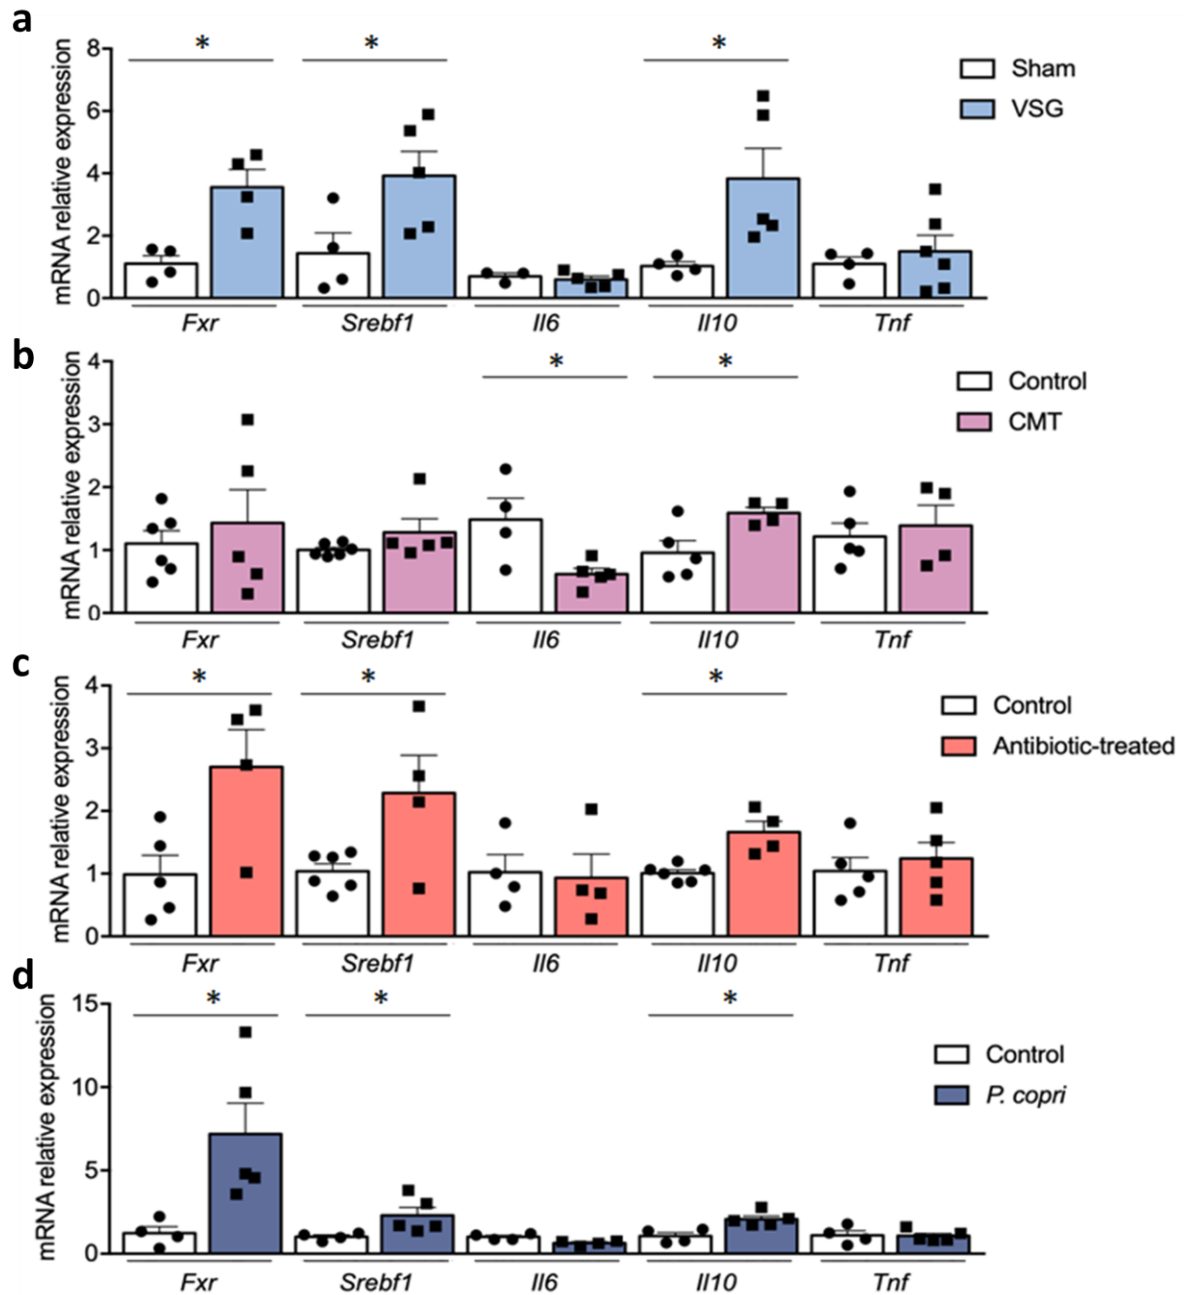

**ESM Figure 10. Gene expression in adipose tissue in treated Goto-Kakizaki (GK) rats and controls.** Gene expression assessed by quantitative RT PCR was determined in adipose tissue from GK rats following vertical sleeve gastrectomy (VSG) (a), caecal microbiota transfer (CMT) from VSG treated GK rats to GK rats (b), treatment of GK rats with *P. copri* permissive antibiotics (c) and inoculation of GK rats with *P. copri* (d). n= 4-6 per group. Data are mean  $\pm$  SEM. \*P<0.05 significantly different to control rats.
